# Supplementary material for: ONO pincer type Pd(ii) complexes: synthesis, crystal structure and catalytic activity towards C-2 arylation of quinoline scaffolds
Source: Royal Society of Chemistry journal article supplement (doi:10.1039/c5ra15342e), 2015-01-01
Supplement: c5ra15342e1.pdf [file c5ra15342e1.pdf]

# **ONO Pincer type Pd(II) complexes: Synthesis, crystal structure and catalytic activity towards C-2 arylation of quinoline scaffolds**

**Vignesh Arumugam <sup>a</sup>, Werner Kaminsky <sup>b</sup> and Dharmaraj Nallasamy <sup>a\*</sup>**

<sup>a</sup>Inorganic & Nanomaterials Research Laboratory, Department of Chemistry,

Bharathiar University, Coimbatore - 641 046, India.

<sup>b</sup>Department of Chemistry, University of Washington, Seattle, Washington 98195,  
USA.

E-mail: dharmaraj@buc.edu.in

Fax: +91 4222422387; Tel: +91 4222428319

## **Contents**

Mechanism Pg. no. 2-3

Tables 1- 4 Pg. no. 4-7

Unit cell packing diagrams of complexes Fig. 1- 4, Pg. no. 8-11

Copies of <sup>1</sup>H & <sup>13</sup>C NMR of complexes Fig. 5 - Fig.12, Pg. no. 12-15

Copies of <sup>1</sup>H & <sup>13</sup>C NMR of coupled products Fig.13 – Fig.60, Pg. 16–39

## MECHANISM FOR THE SMC REACTION

In general, the pincer type ligand can increase the electron density at palladium(II) centers and promote the generation of the Pd(IV) species. Therefore, Pd(IV) intermediates are considered as the reactive species in the mechanism of the SMC reaction of aryl halides at above room-temperature. In addition, Pd(II)/Pd(IV) cycle helps facile reductive elimination from Pd(IV) intermediate. However, Pd(IV) intermediates are unstable and hence, could not be isolated.<sup>1</sup> In view of these facts and previous reports,<sup>2,3</sup> a plausible mechanism for this reaction has been proposed in Scheme 2. In the first step, the active Pd(II) species **I** undergoes an oxidative addition of 2-chloroquinoline to form a Pd(IV) intermediate **II** followed by a metathetic exchange upon the addition of KOH to the intermediate **II** resulting in the formation of KCl and intermediate **III**. Subsequent transmetalation between Pd(IV) and the phenylboronic acid yielded intermediate **IV** that underwent a reductive elimination to afford respective 2-phenylquinoline *via* C–C sigma bond formation and regeneration of the active Pd(II) species.

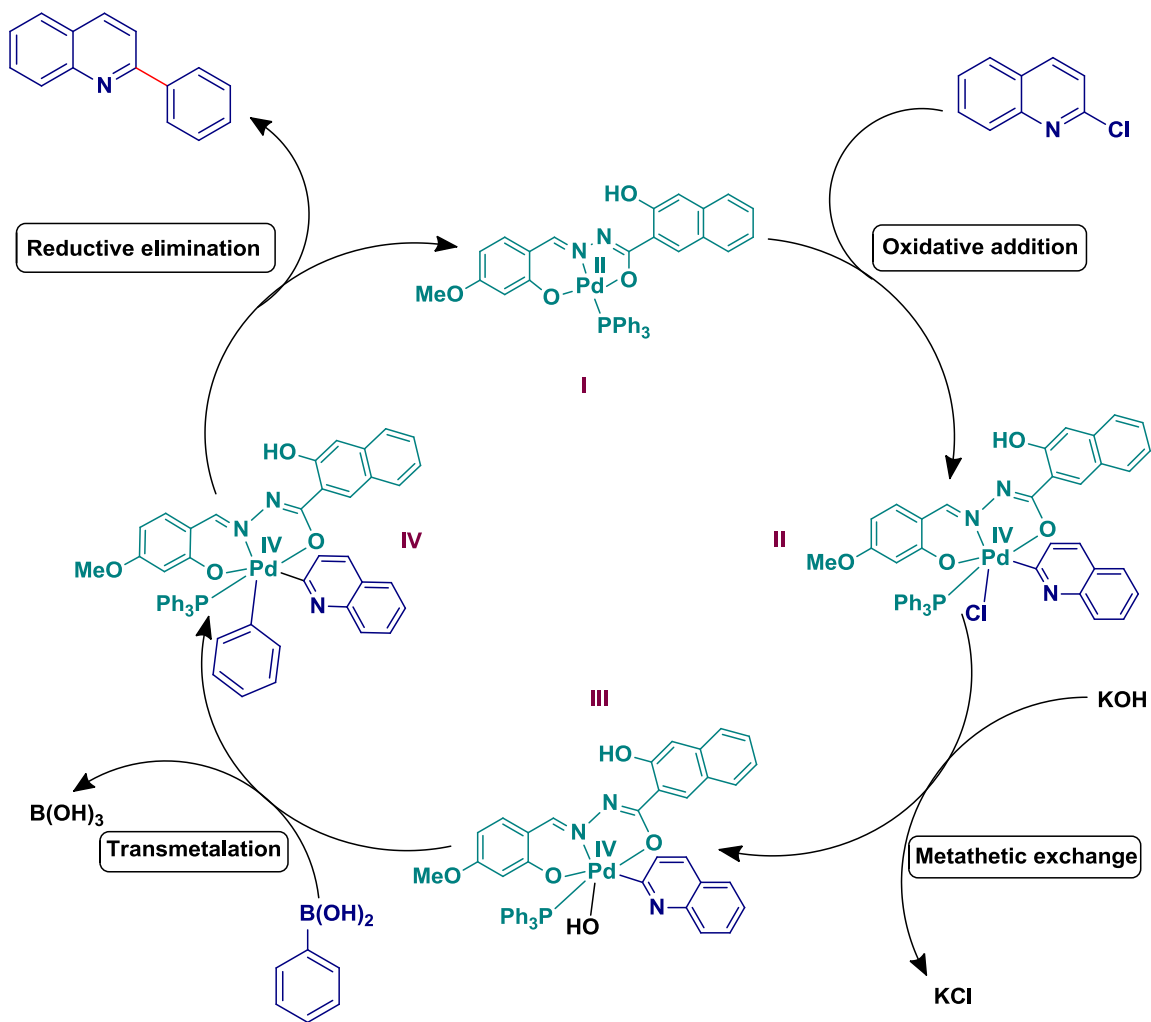

**Scheme 2.** Plausible mechanism for SMC reaction of 2-chloroquinoline with phenylboronic acid.

## References

- 1) (a) H. Zhang and A. Lei, *Dalton Trans.*, 2011, **40**, 8745. (b) J. L. Bolliger, O. Blacque, C. M. Frech, *Chem. Eur. J.*, 2008, **14**, 7969.
- 2) A. Vignesh, W. Kaminsky, N. S. P. Bhuvanesh, N. Dharmaraj, *RSC Adv.*, 2015, **5**, 59428.
- 3) (a) N. Miyaura and A. Suzuki, *Chem. Rev.*, 1995, **95**, 2457. (b) A. J. J. Lennox and G. C. L. Jones, *Chem. Soc. Rev.*, 2014, **43**, 412

**Table1.** Selected bond lengths (Å) and angles (°) for the complexes **1** and **2**

| Complex             | 1          | 2          |
|---------------------|------------|------------|
| Pd(1) – N(1)        | 1.995(2)   | 1.990(4)   |
| Pd(1) – O(1)        | 1.9830(18) | 1.976(2)   |
| Pd(1) – O(2)        | 1.9998(18) | 1.988(3)   |
| Pd(1) – P(1)        | 2.2801(7)  | 2.2814(13) |
| N(1) – C(7)         | 1.274(4)   | 1.285(5)   |
| O(1) – C(1)         | 1.320(3)   | 1.325(5)   |
| O(2) – C(8)         | 1.301(3)   | 1.299(5)   |
| N(1) – N(2)         | 1.401(3)   | 1.404(4)   |
| N(2) – C(8)         | 1.324(4)   | 1.316(5)   |
| C(7) – C(6)         | 1.438(4)   | 1.442(6)   |
| C(1) – C(6)         | 1.420(4)   | 1.418(6)   |
| N(1) – Pd(1)– O(1)  | 93.85(8)   | 94.33(12)  |
| N(1) – Pd(1)– O(2)  | 80.44(8)   | 80.37(12)  |
| O(1) – Pd(1)– O(2)  | 174.29(8)  | 174.30(13) |
| N(1) – Pd(1)– P(1)  | 174.77(7)  | 173.09(9)  |
| O(1) – Pd(1)– P(1)  | 90.50(6)   | 91.38(10)  |
| O(2) – Pd(1)– P(1)  | 95.20(6)   | 94.05(10)  |
| C(7) – N(1) – Pd(1) | 126.86(19) | 126.4(3)   |
| N(2) – C(8)– O(2)   | 125.3(2)   | 125.4(4)   |
| N(2) – N(1)– Pd(1)  | 113.67(17) | 113.8(2)   |

**Table 2.** Selected bond lengths (Å) and angles (°) for the complex **3**

| Complex            | 3          |
|--------------------|------------|
| Pd(1) – N(1)       | 1.9858(16) |
| Pd(1) – O(1)       | 2.0055(14) |
| Pd(1) – O(2)       | 1.9686(14) |
| Pd(1) – P(1)       | 2.2950(5)  |
| N(1) – C(8)        | 1.2780(3)  |
| O(1) – C(9)        | 1.3070(2)  |
| O(2) – C(1)        | 1.3170(2)  |
| N(1) – N(2)        | 1.4040(2)  |
| N(2) – C(9)        | 1.317(3)   |
| C(8) – C(6)        | 1.420(3)   |
| C(1) – C(6)        | 1.427(3)   |
| N(1) – Pd(1)– O(1) | 80.11(6)   |
| N(1) – Pd(1)– O(2) | 85.31(4)   |

|                     |            |
|---------------------|------------|
| O(1) – Pd(1)– O(2)  | 174.37(6)  |
| N(1) – Pd(1)– P(1)  | 179.17(5)  |
| O(1) – Pd(1)– P(1)  | 100.31(4)  |
| O(2) – Pd(1)– P(1)  | 85.31(4)   |
| C(8) – N(1) – Pd(1) | 125.99(14) |
| N(2) – C(9)– O(1)   | 124.54(18) |
| N(2) – N(1)– Pd(1)  | 114.15(12) |

**Table 3.** Selected bond lengths (Å) and angles (°) for the complex **4**

| Complex             | <b>4</b>   |
|---------------------|------------|
| Pd(1) – N(1)        | 1.993(4)   |
| Pd(1) – O(1)        | 1.969(4)   |
| Pd(1) – O(3)        | 1.991(4)   |
| Pd(1) – P(1)        | 2.2885(14) |
| N(1) – C(1)         | 1.277(7)   |
| O(1) – C(3)         | 1.311(6)   |
| O(3) – C(9)         | 1.293(6)   |
| N(1) – N(2)         | 1.395(6)   |
| N(2) – C(9)         | 1.316(7)   |
| C(1) – C(2)         | 1.430(8)   |
| C(2) – C(3)         | 1.421(8)   |
| N(1) – Pd(1)– O(1)  | 94.23(19)  |
| N(1) – Pd(1)– O(3)  | 80.15(18)  |
| O(1) – Pd(1)– O(3)  | 173.74(15) |
| N(1) – Pd(1)– P(1)  | 172.74(13) |
| O(1) – Pd(1)– P(1)  | 90.35(11)  |
| O(3) – Pd(1)– P(1)  | 80.15(18)  |
| C(1) – N(1) – Pd(1) | 125.3(4)   |
| N(2) – C(9)– O(3)   | 125.7(6)   |
| N(2) – N(1)– Pd(1)  | 113.8(3)   |

**Table 4.** Crystal data and structure refinement for complexes **1- 4**

| <b>Complex</b>                             | <b>1</b>                                                           | <b>2</b>                                                           | <b>3</b>                                                           | <b>4</b>                                                           |
|--------------------------------------------|--------------------------------------------------------------------|--------------------------------------------------------------------|--------------------------------------------------------------------|--------------------------------------------------------------------|
| CCDC number                                | <b>1047924</b>                                                     | <b>1047925</b>                                                     | <b>1047926</b>                                                     | <b>1047927</b>                                                     |
| Empirical formula                          | C <sub>32</sub> H <sub>25</sub> N <sub>2</sub> O <sub>3</sub> P Pd | C <sub>36</sub> H <sub>27</sub> N <sub>2</sub> O <sub>3</sub> P Pd | C <sub>33</sub> H <sub>27</sub> N <sub>2</sub> O <sub>4</sub> P Pd | C <sub>37</sub> H <sub>29</sub> N <sub>2</sub> O <sub>4</sub> P Pd |
| Formula weight                             | 622.91                                                             | 672.97                                                             | 652.94                                                             | 702.99                                                             |
| Temperature (K)                            | 130(2)                                                             | 130(2)                                                             | 100(2)                                                             | 100(2)                                                             |
| Wavelength (Å)                             | 0.71073                                                            | 0.71073                                                            | 0.71073                                                            | 0.71073                                                            |
| Crystal system                             | Triclinic                                                          | Monoclinic                                                         | Monoclinic                                                         | Monoclinic                                                         |
| Space group                                | P -1                                                               | P 2 <sub>1</sub> /a                                                | P 2 <sub>1</sub> /c                                                | P 2 <sub>1</sub> /c                                                |
| Unit cell dimensions                       |                                                                    |                                                                    |                                                                    |                                                                    |
| a (Å)                                      | 9.2348(5)                                                          | 8.8683(4)                                                          | 11.0075(5)                                                         | 15.087(2)                                                          |
| b (Å)                                      | 10.1529(5)                                                         | 21.5484(10)                                                        | 28.2609(12)                                                        | 21.144(3)                                                          |
| c (Å)                                      | 15.3801(10)                                                        | 15.2026(7)                                                         | 8.8037(4)                                                          | 9.3879(15)                                                         |
| α (°)                                      | 97.685(4)                                                          | 90                                                                 | 90                                                                 | 90                                                                 |
| β (°)                                      | 90.359(4)                                                          | 96.079(3)                                                          | 92.227(2)                                                          | 94.528(8)                                                          |
| γ (°)                                      | 110.319(4)                                                         | 90                                                                 | 90                                                                 | 90                                                                 |
| Volume (Å <sup>3</sup> )                   | 1338.00(13)                                                        | 2888.8(2)                                                          | 2736.6(2)                                                          | 2985.5(8)                                                          |
| Z                                          | 2                                                                  | 4                                                                  | 4                                                                  | 4                                                                  |
| Density(calculated) (Mg m <sup>-3</sup> )  | 1.546                                                              | 1.547                                                              | 1.585                                                              | 1.564                                                              |
| Absorption coefficient (mm <sup>-1</sup> ) | 0.791                                                              | 0.739                                                              | 0.780                                                              | 0.721                                                              |
| F(000)                                     | 632                                                                | 1368                                                               | 1328                                                               | 1432                                                               |
| Crystal size (mm <sup>3</sup> )            | 0.35 x 0.30 x 0.09                                                 | 0.40 x 0.25 x 0.20                                                 | 0.30 x 0.15 x 0.10                                                 | 0.45 x 0.15 x 0.02                                                 |
| Reflections collected                      | 10984                                                              | 12436                                                              | 127872                                                             | 40321                                                              |
| Independent reflections                    | 6588[R(int)=0.0576]                                                | 7108 [R(int)=0.1187]                                               | 6828 [R(int)=0.0271]                                               | 5156 [R(int)=0.0930]                                               |

|                                                        |                                        |                                        |                                        |                                        |
|--------------------------------------------------------|----------------------------------------|----------------------------------------|----------------------------------------|----------------------------------------|
| Max. and<br>min. transmission                          | 0.9322 and<br>0.7693                   | 0.8663 and<br>0.7564                   | 0.9261 and<br>0.7997                   | 0.9857 and 0.7373                      |
| Refinement<br>method                                   | Full-matrix least-<br>squares on $F^2$ |
| Data/restraints/<br>parameters                         | 6588 / 0 / 355                         | 7108 / 0 / 389                         | 6828 / 0 / 374                         | 5156 / 0 / 410                         |
| Goodness-of-fit on                                     | 1.051                                  | 0.935                                  | 1.174                                  | 1.082                                  |
| Final R indices<br>[ $I > 2\sigma(I)$ ]                | R1 = 0.0413,<br>wR2 = 0.0917           | R1 = 0.0585,<br>wR2 = 0.1137           | R1 = 0.0286,<br>wR2 = 0.0642           | R1 = 0.0568,<br>wR2 = 0.1004           |
| R indices<br>(all data)                                | R1 = 0.0559, wR2<br>= 0.0978           | R1 = 0.1147,<br>wR2 = 0.1310           | R1 = 0.0301,<br>wR2 = 0.0650           | R1 = 0.0964,<br>wR2 = 0.1155           |
| Largest diff. peak<br>and hole ( $e.\text{\AA}^{-3}$ ) | 1.256 and -1.367                       | 2.350 and -1.764                       | 0.601 and -0.607                       | 0.728 and -0.808                       |

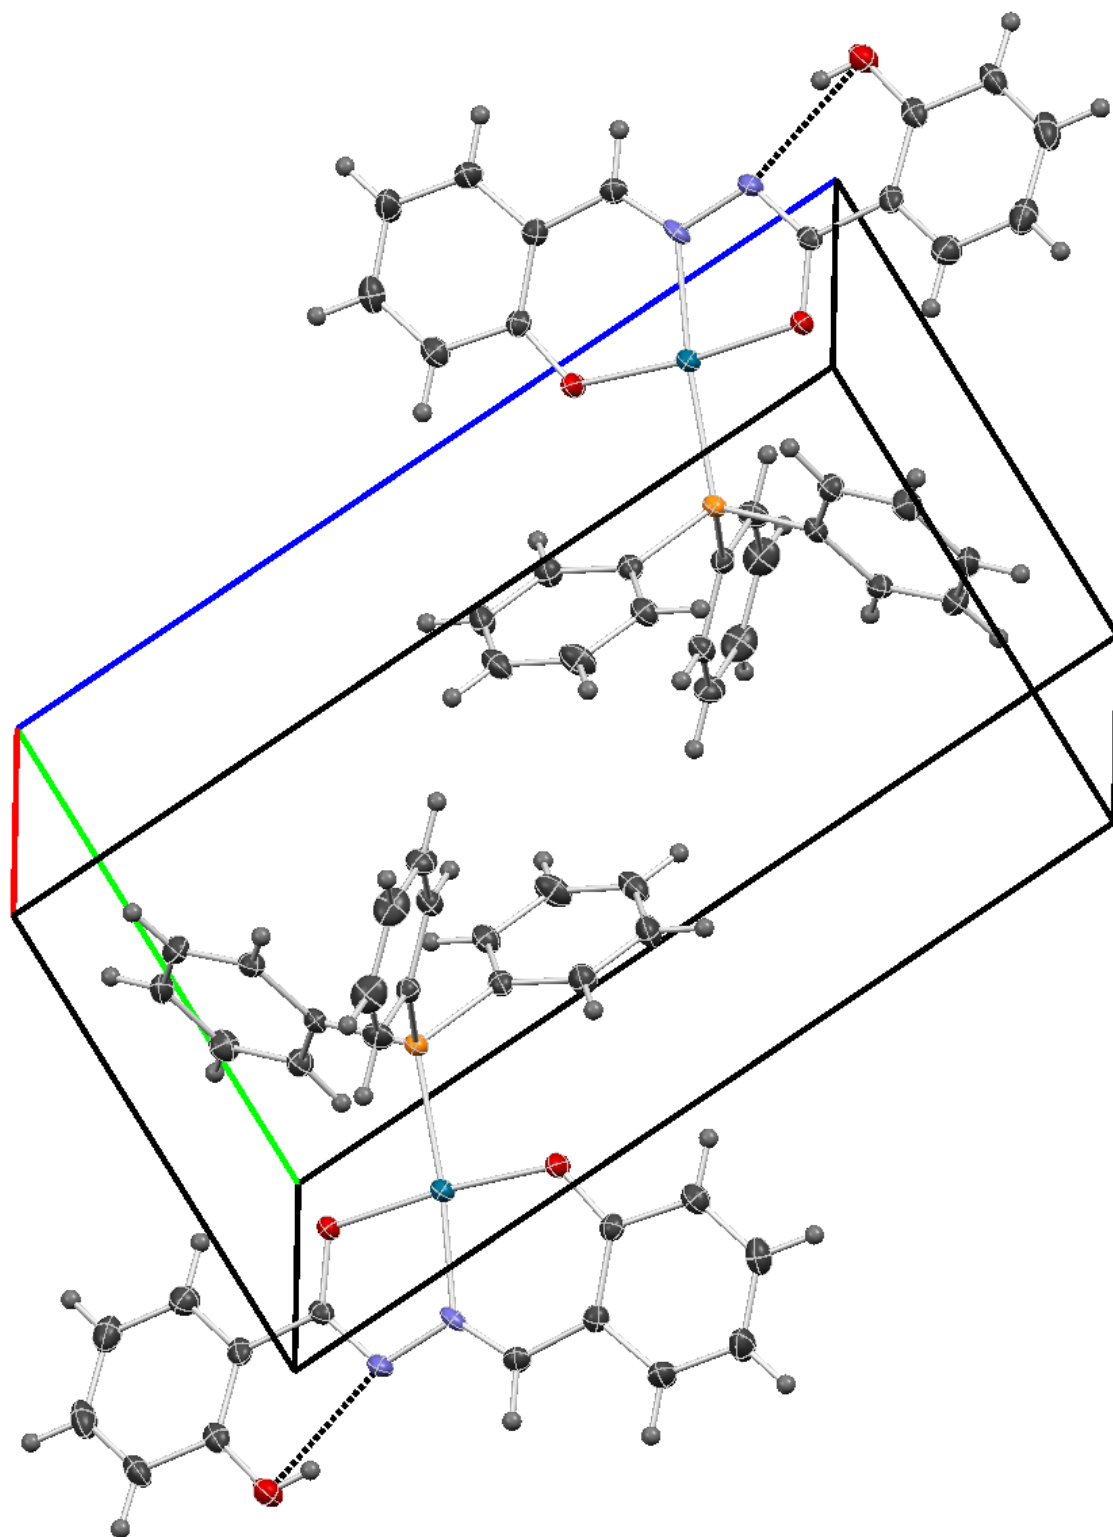

**Fig. 1.** Unit cell packing diagram of complex **1** with intra molecular hydrogen bonding.



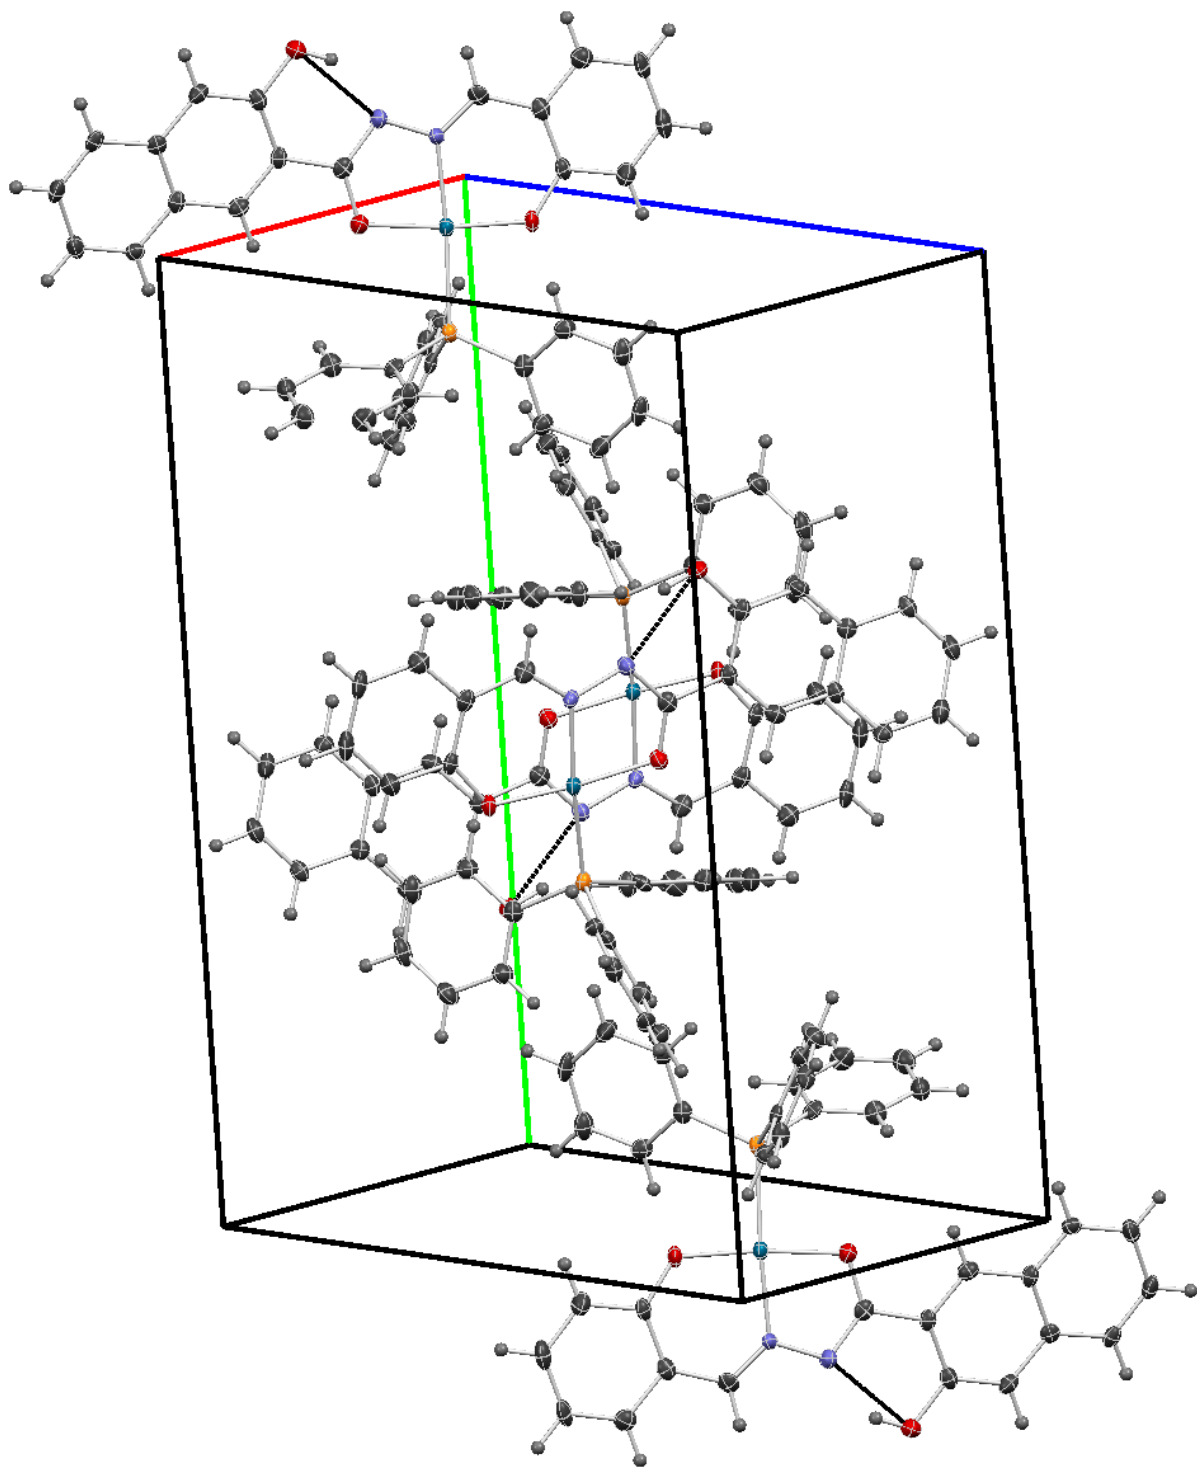

**Fig. 2.** Unit cell packing diagram of complex 2 with intra molecular hydrogen bonding.

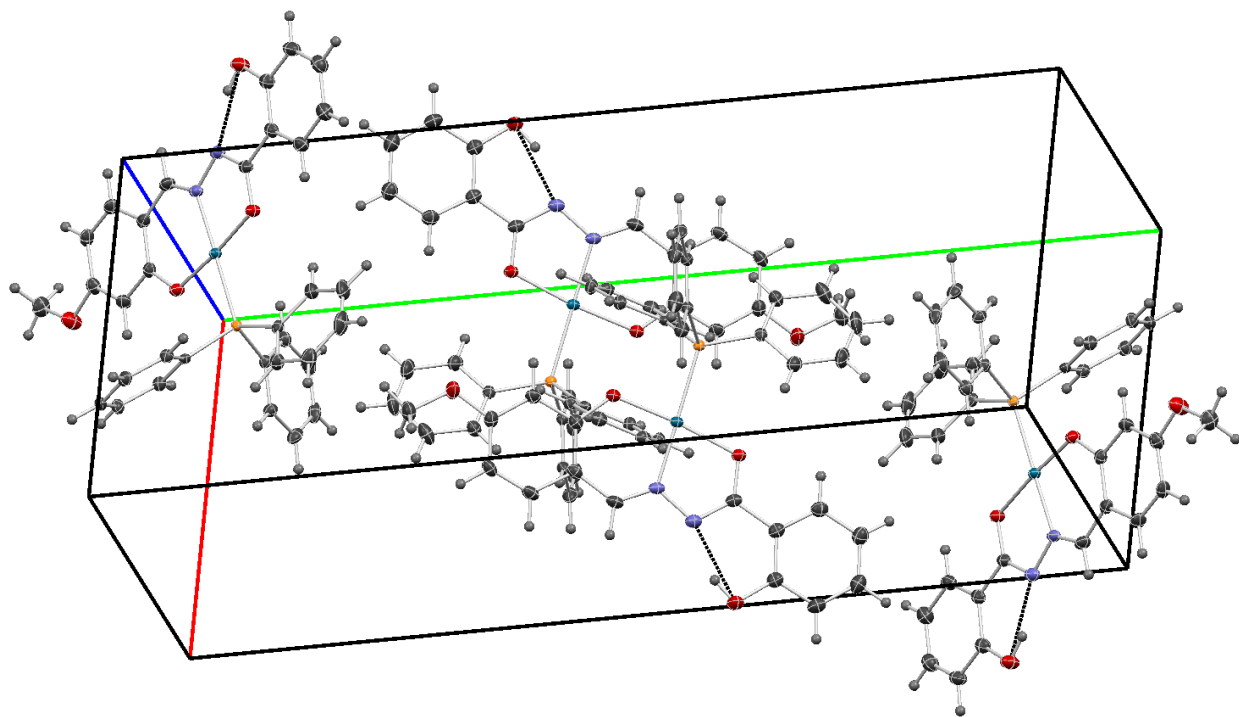

**Fig. 3.** Unit cell packing diagram of complex **3** with intra molecular hydrogen bonding.

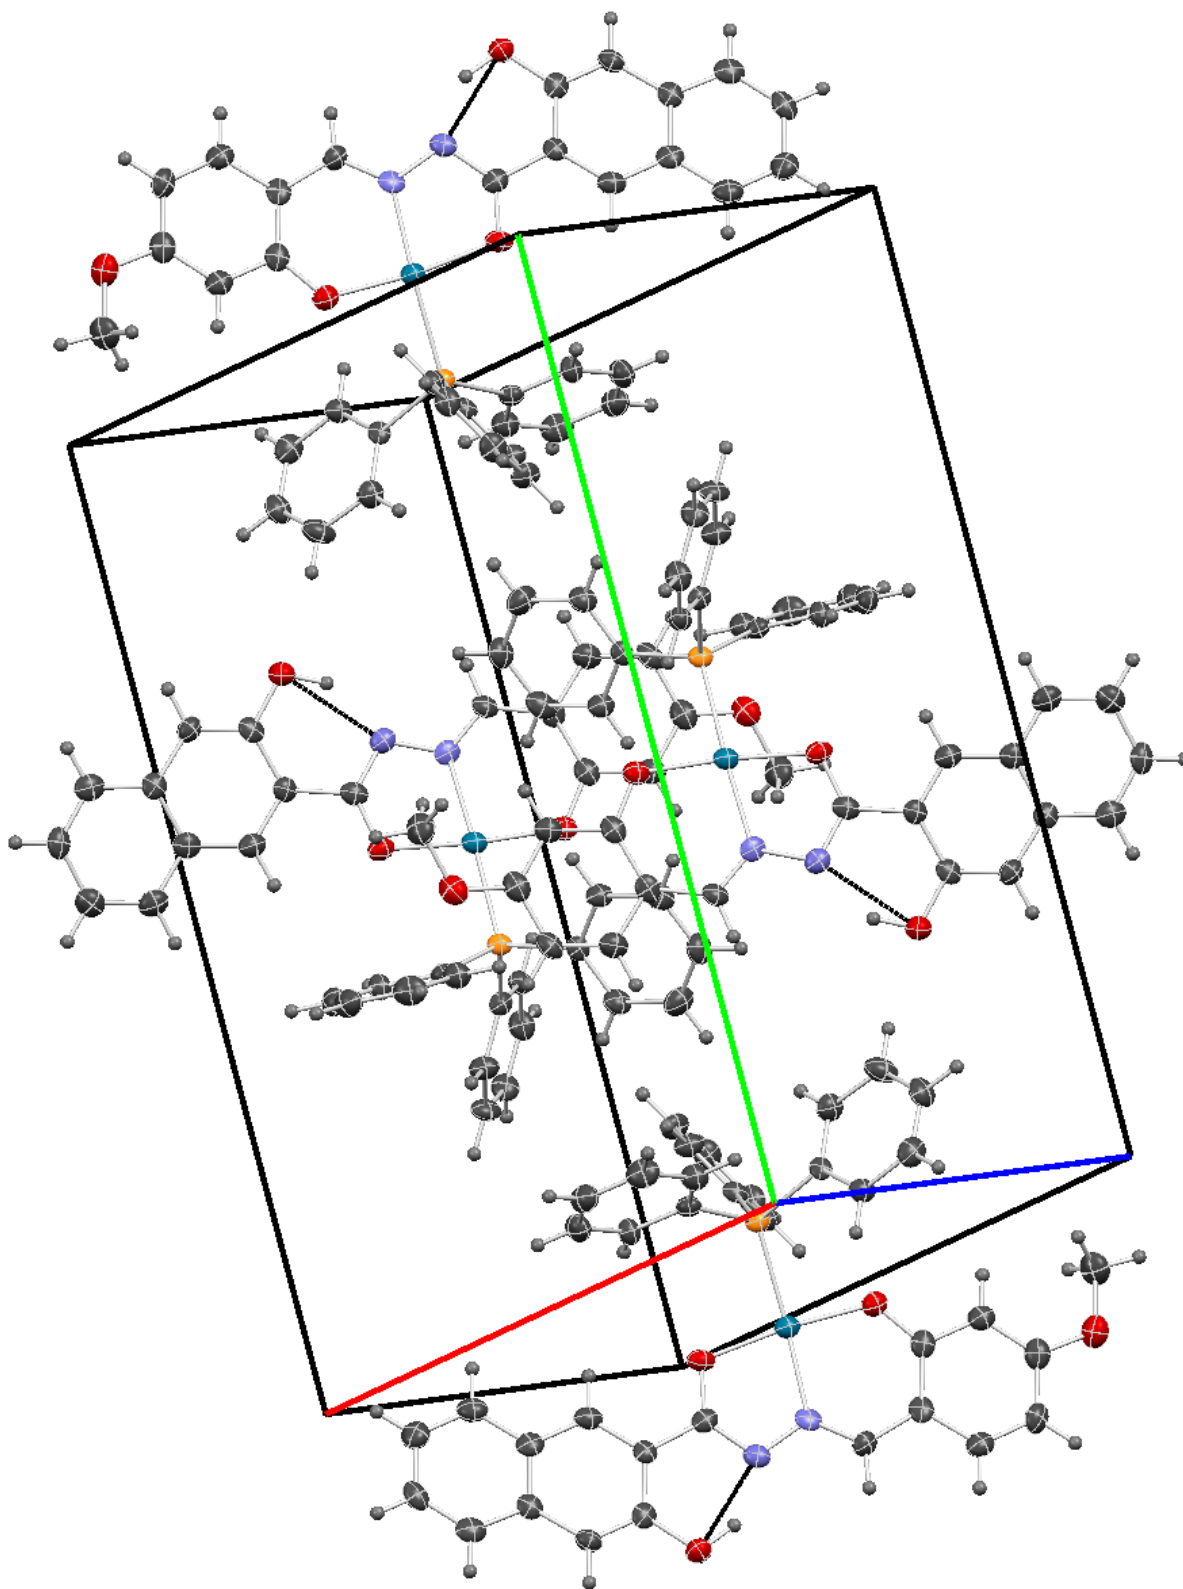

**Fig. 4.** Unit cell packing diagram of complex 4 with intra molecular hydrogen bonding.

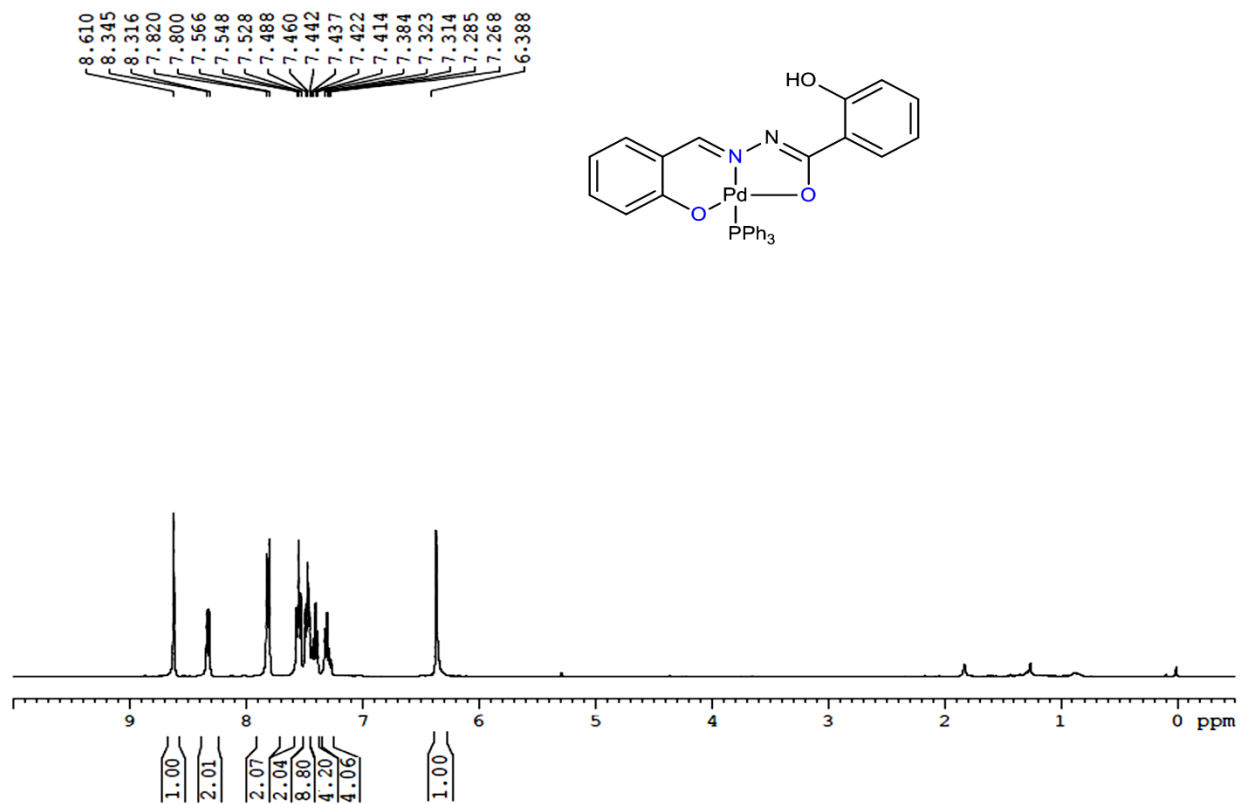

**Fig. 5.**  $^1\text{H NMR}$  spectrum of complex 1

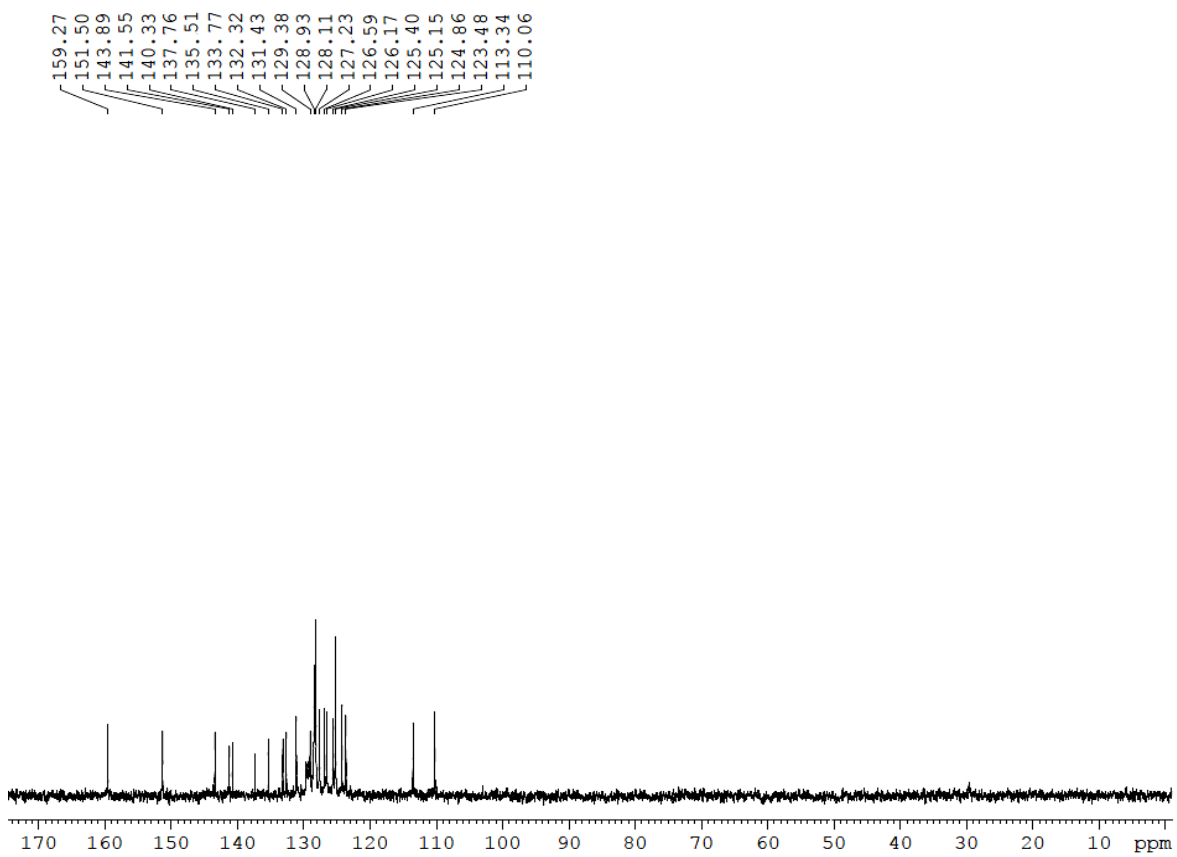

**Fig. 6.**  $^{13}\text{C NMR}$  spectrum of complex 1

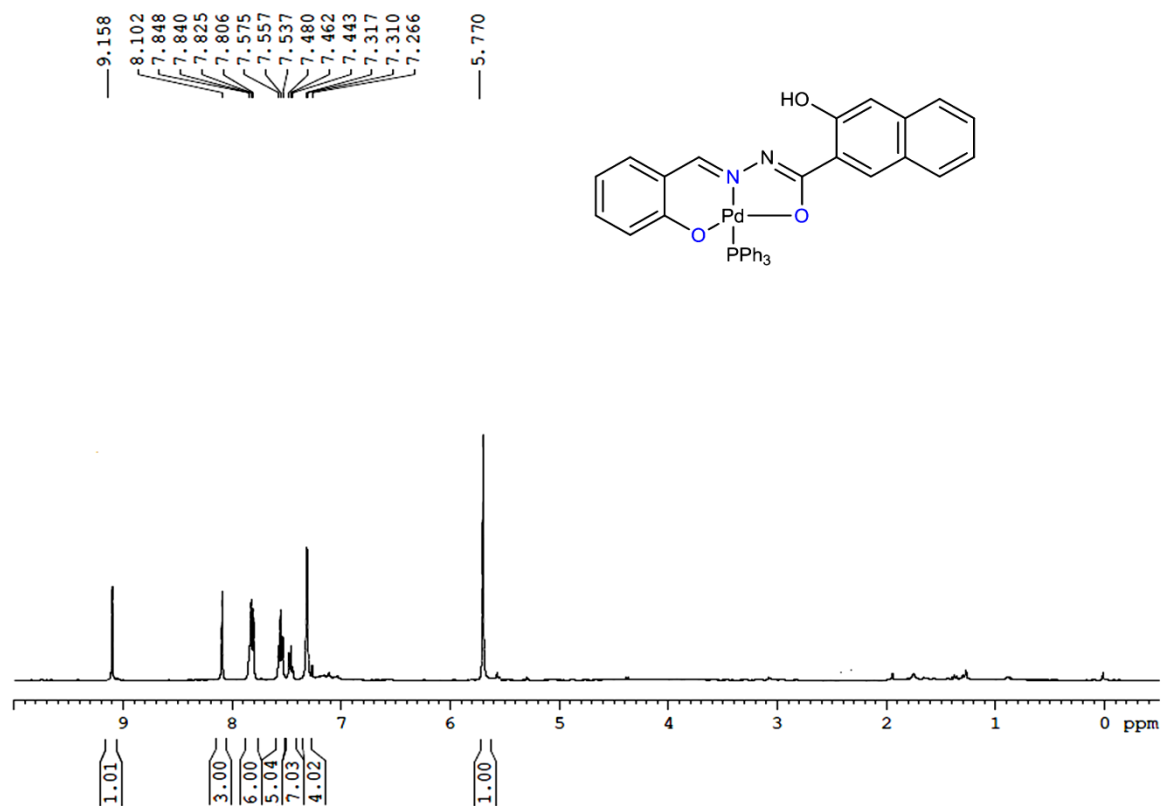

**Fig. 7.**  $^1\text{H}$  NMR spectrum of complex 2

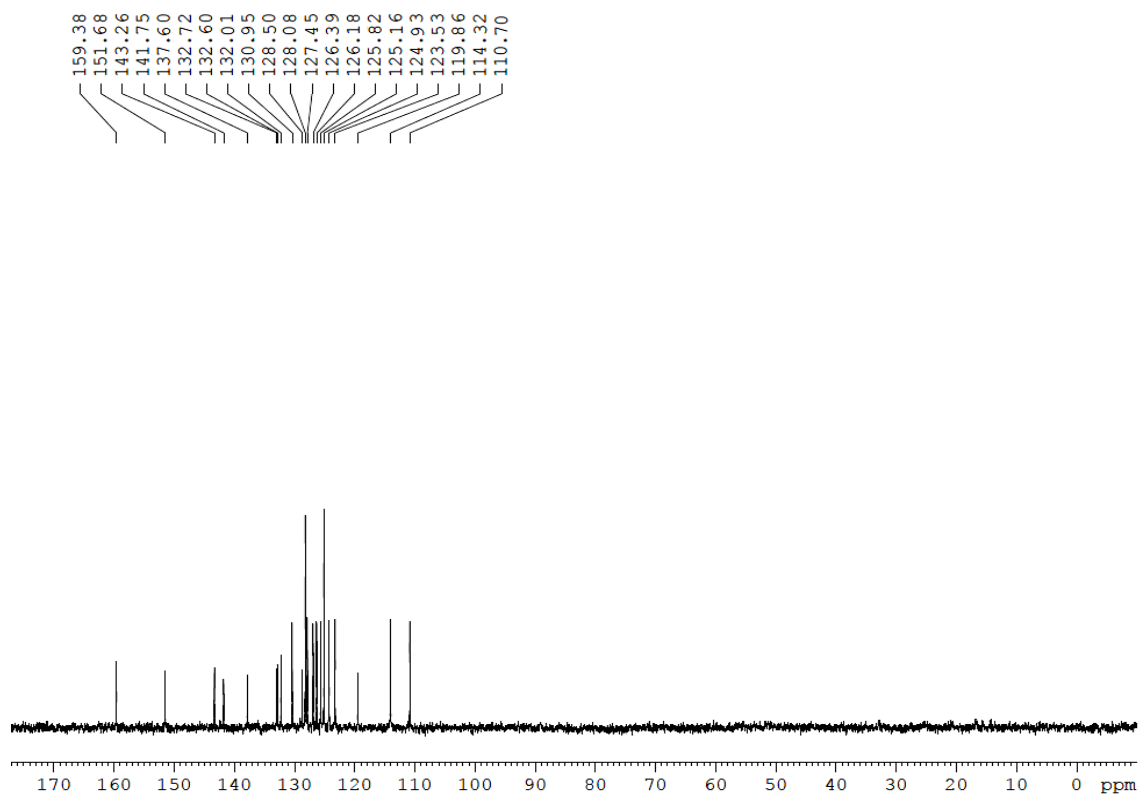

**Fig. 8.**  $^{13}\text{C}$  NMR spectrum of complex 2

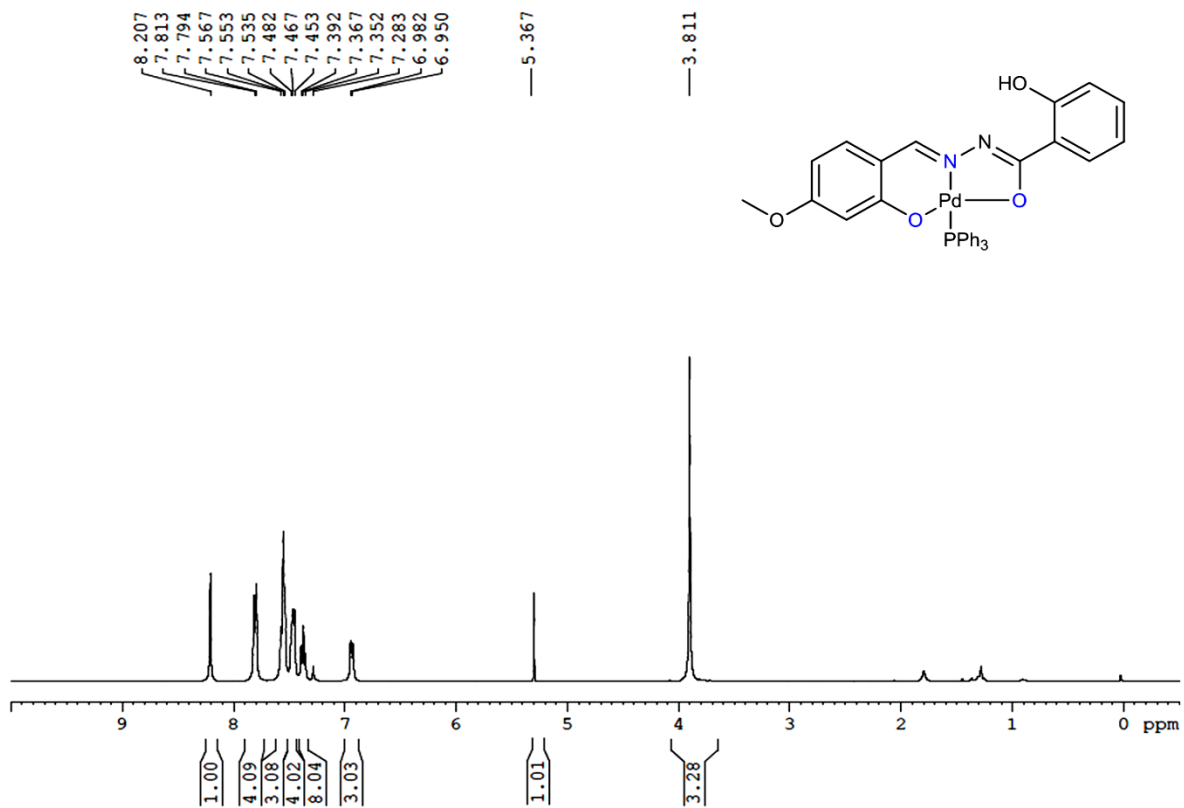

**Fig. 9.**  $^1\text{H}$  NMR spectrum of complex 3

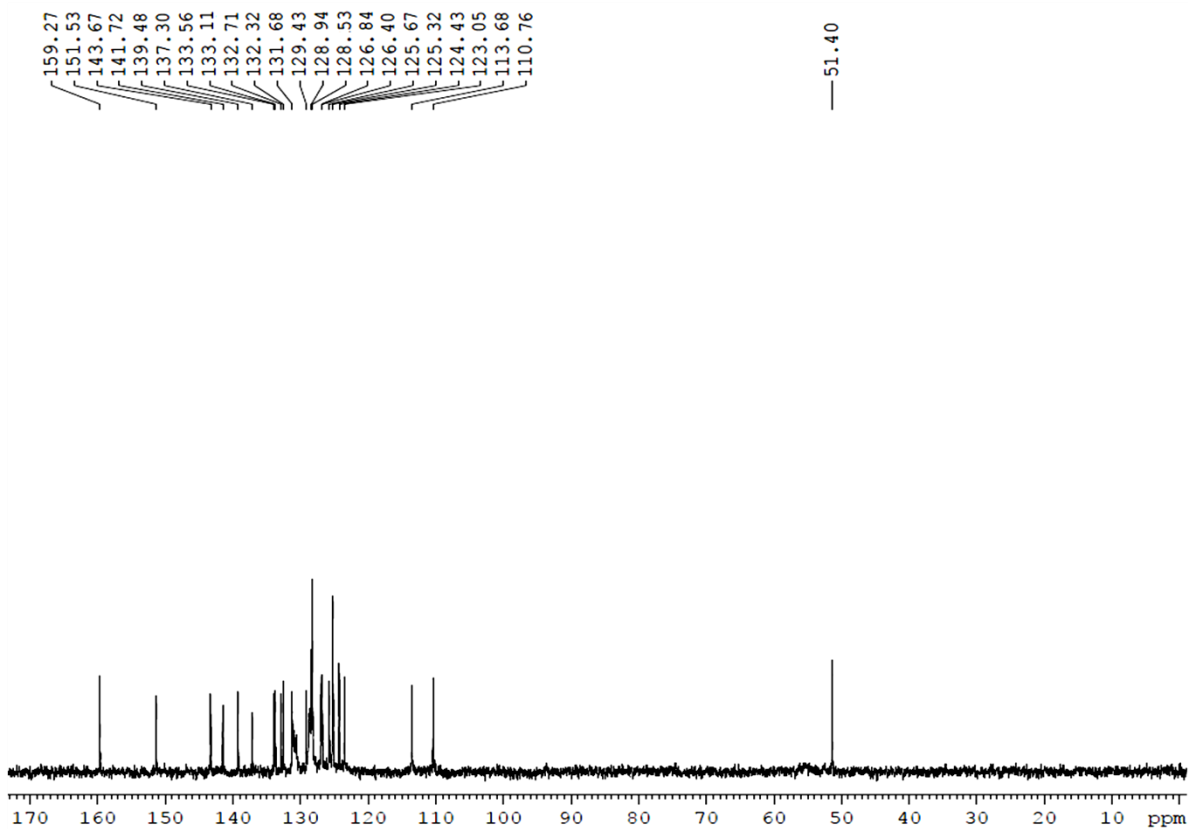

**Fig. 10.**  $^{13}\text{C}$  NMR spectrum of complex 3

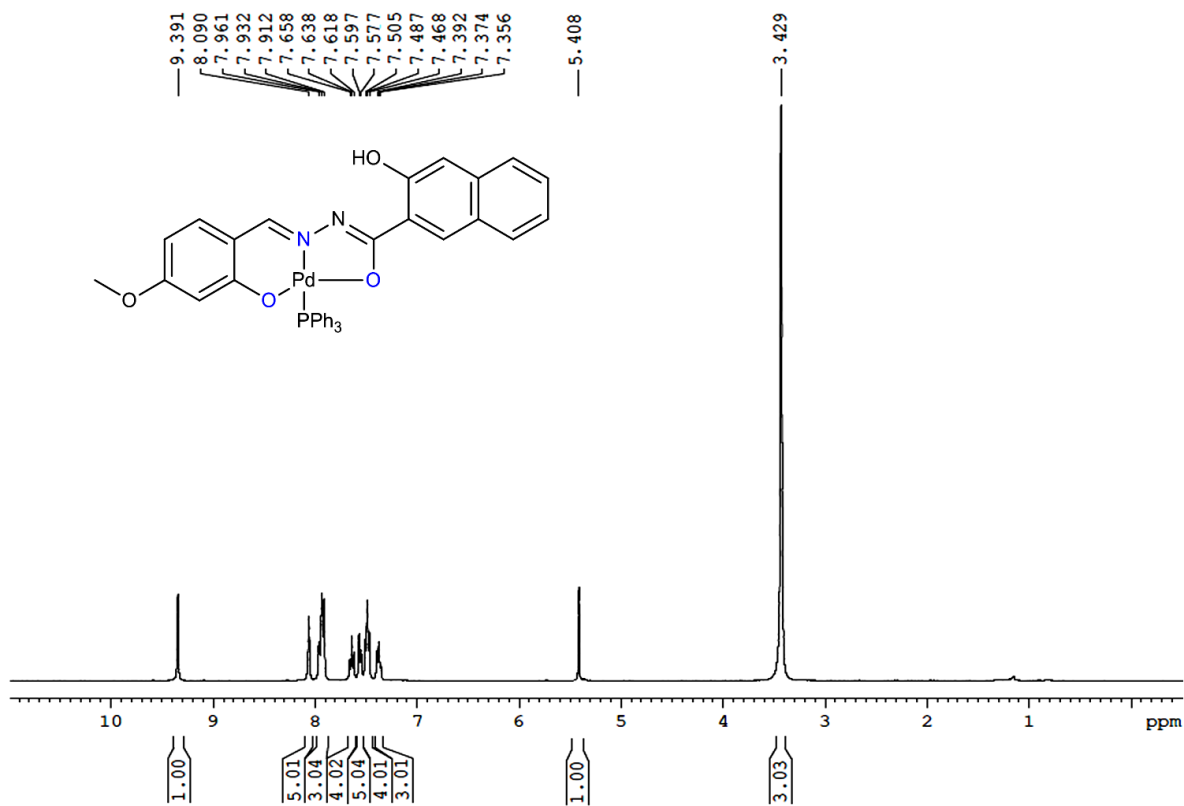

**Fig. 11.**  $^1\text{H}$  NMR spectrum of complex 4

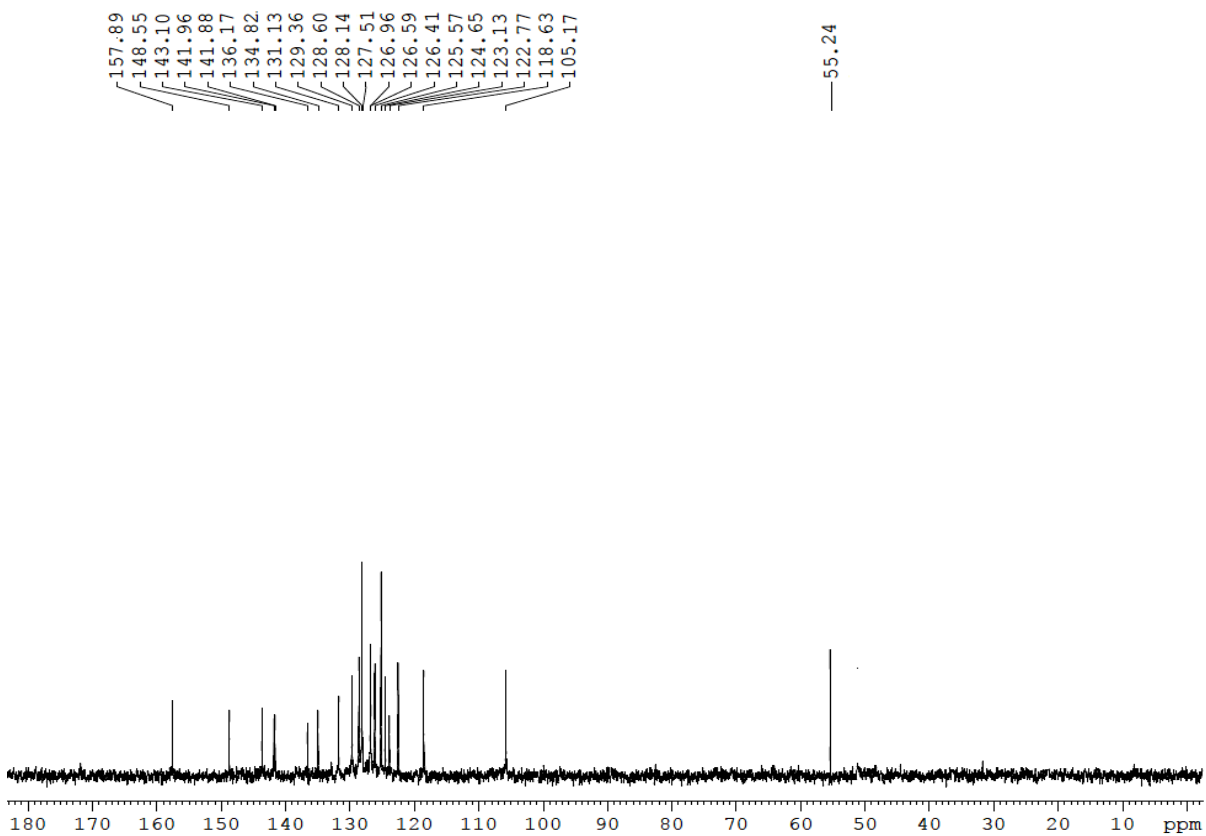

**Fig. 12.**  $^{13}\text{C}$  NMR spectrum of complex 4

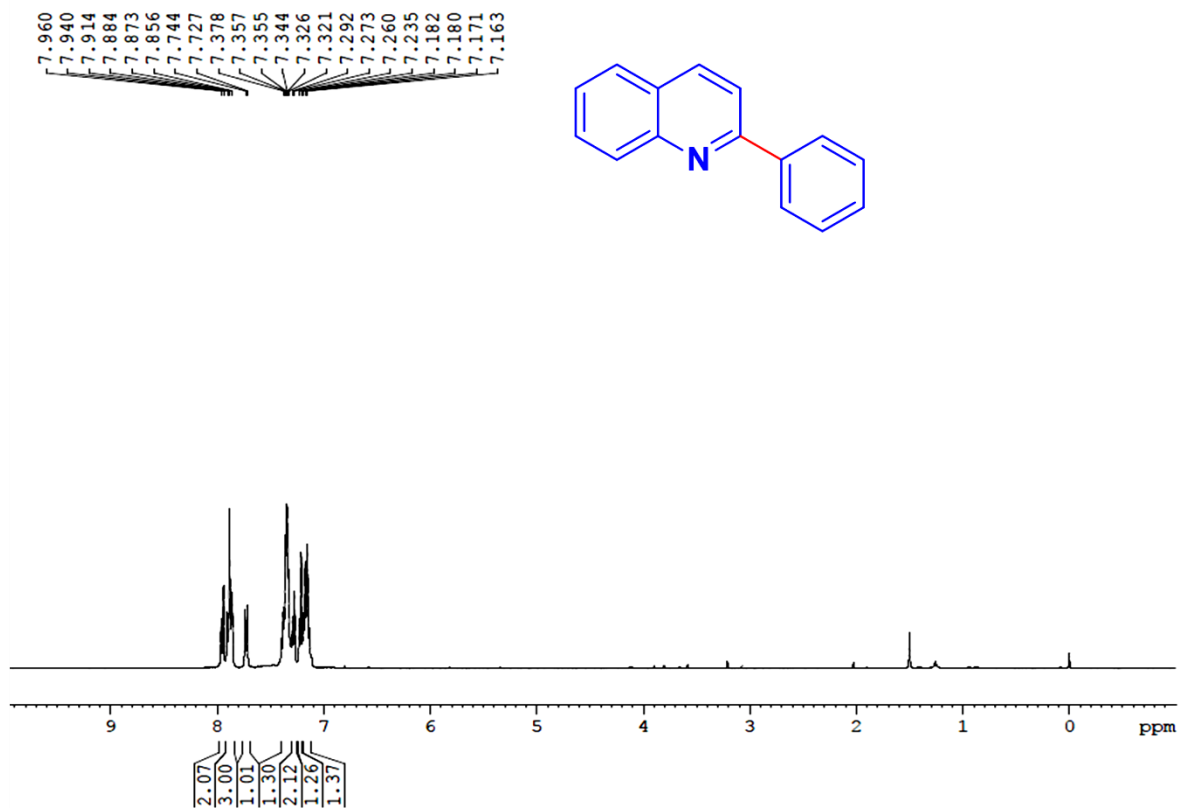

**Fig. 13.** <sup>1</sup>H NMR spectrum of 2-phenyl-quinoline (1a )

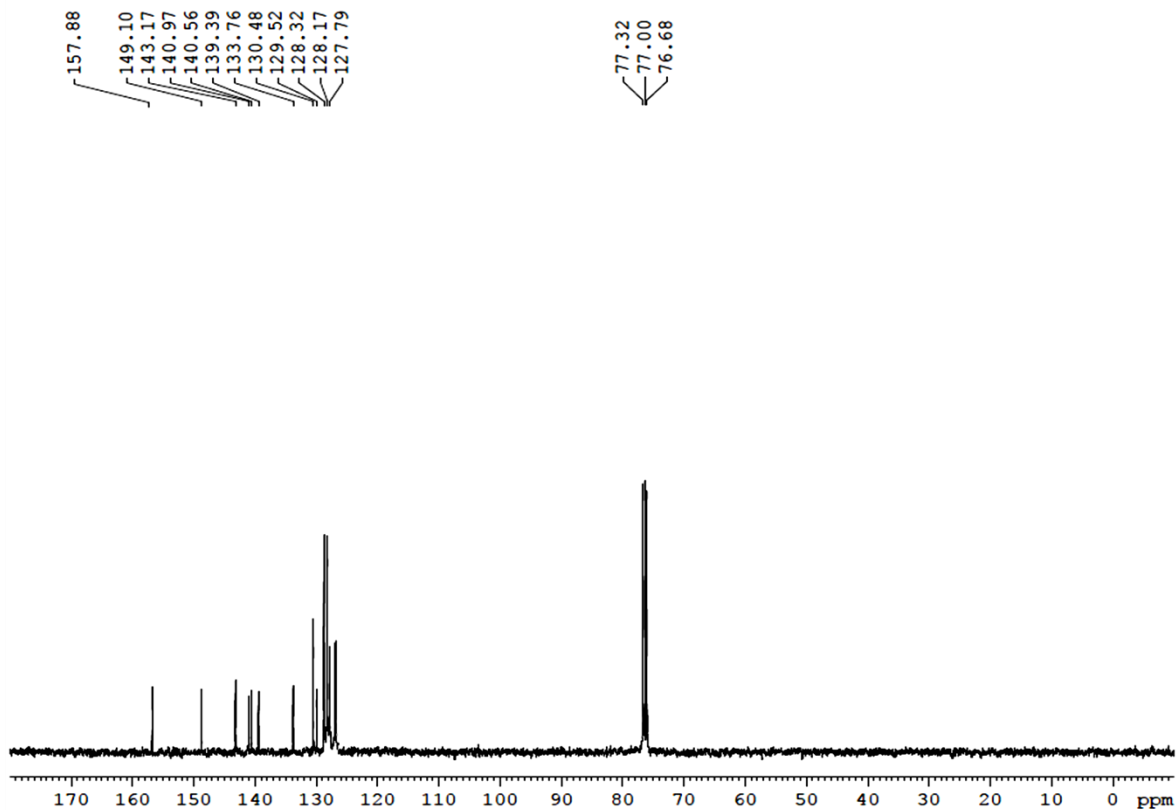

**Fig. 14.** <sup>13</sup>C NMR spectrum of 2-phenyl-quinoline (1a)



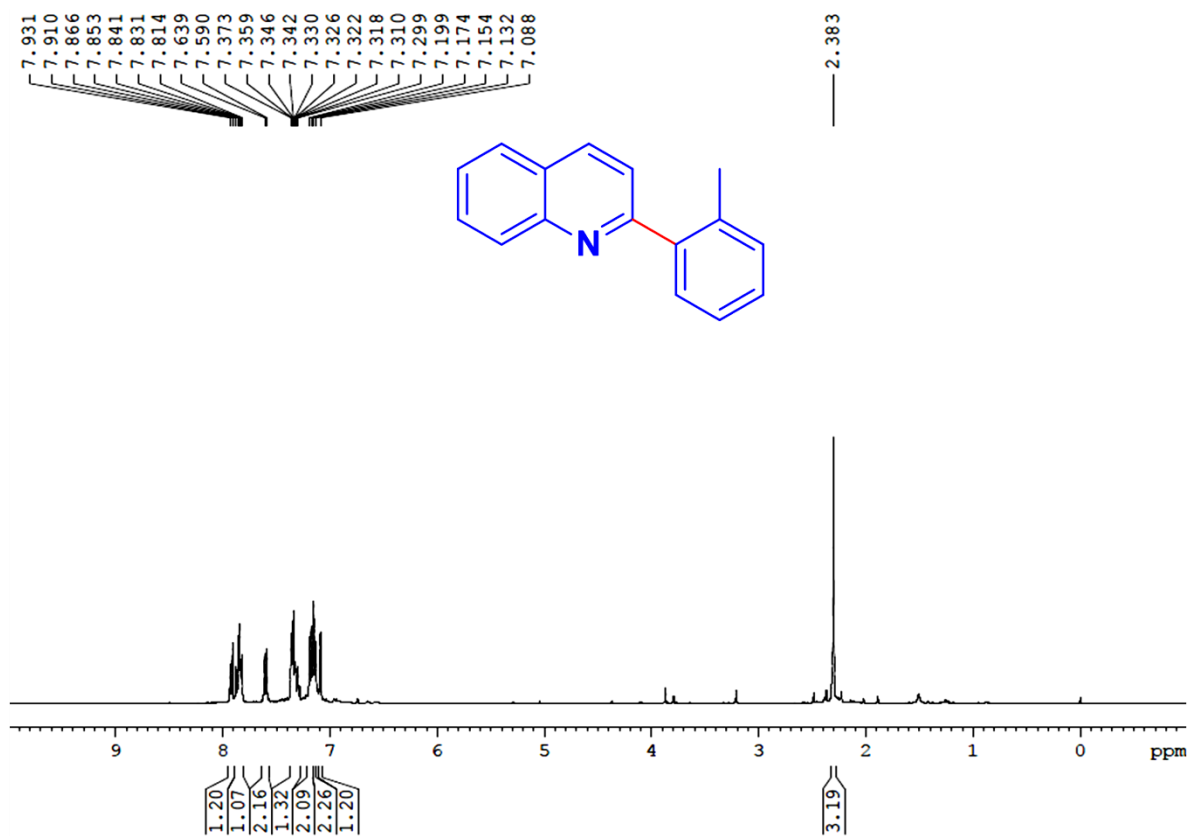

**Fig. 15.** <sup>1</sup>H NMR spectrum of 2-*o*-tolylquinoline (1b)

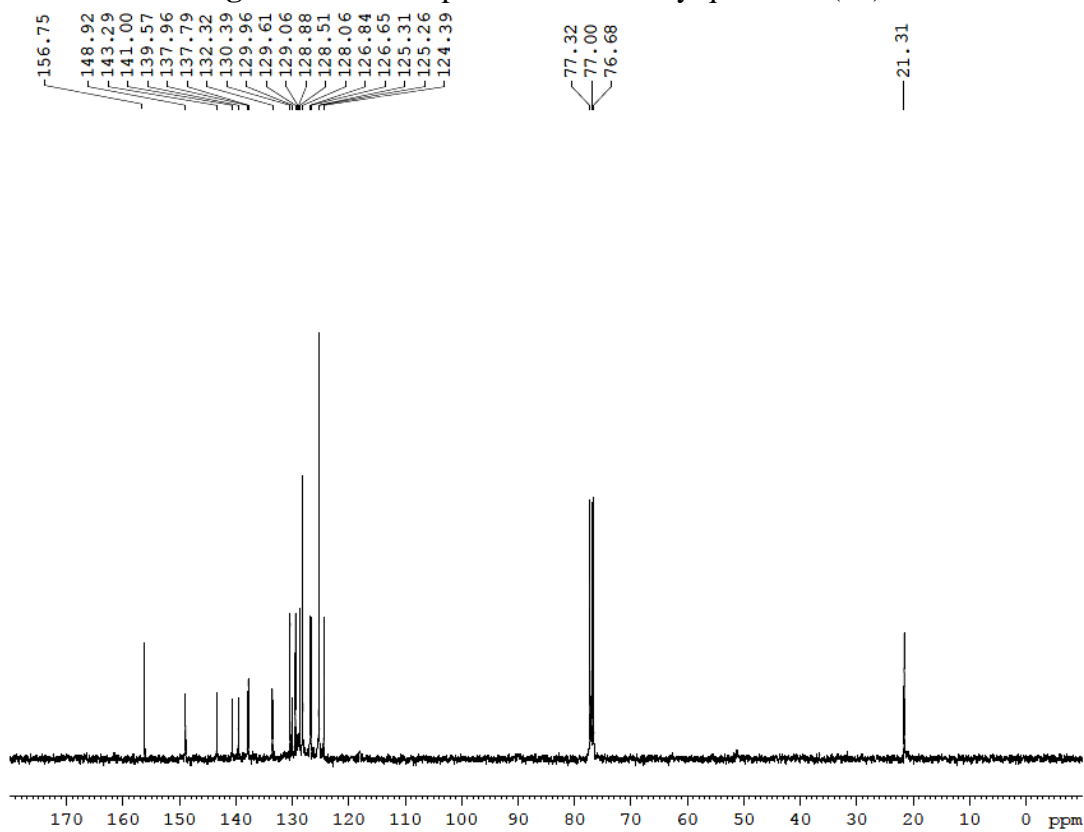

**Fig. 16.** <sup>13</sup>C NMR spectrum of 2-*o*-tolylquinoline (1b)

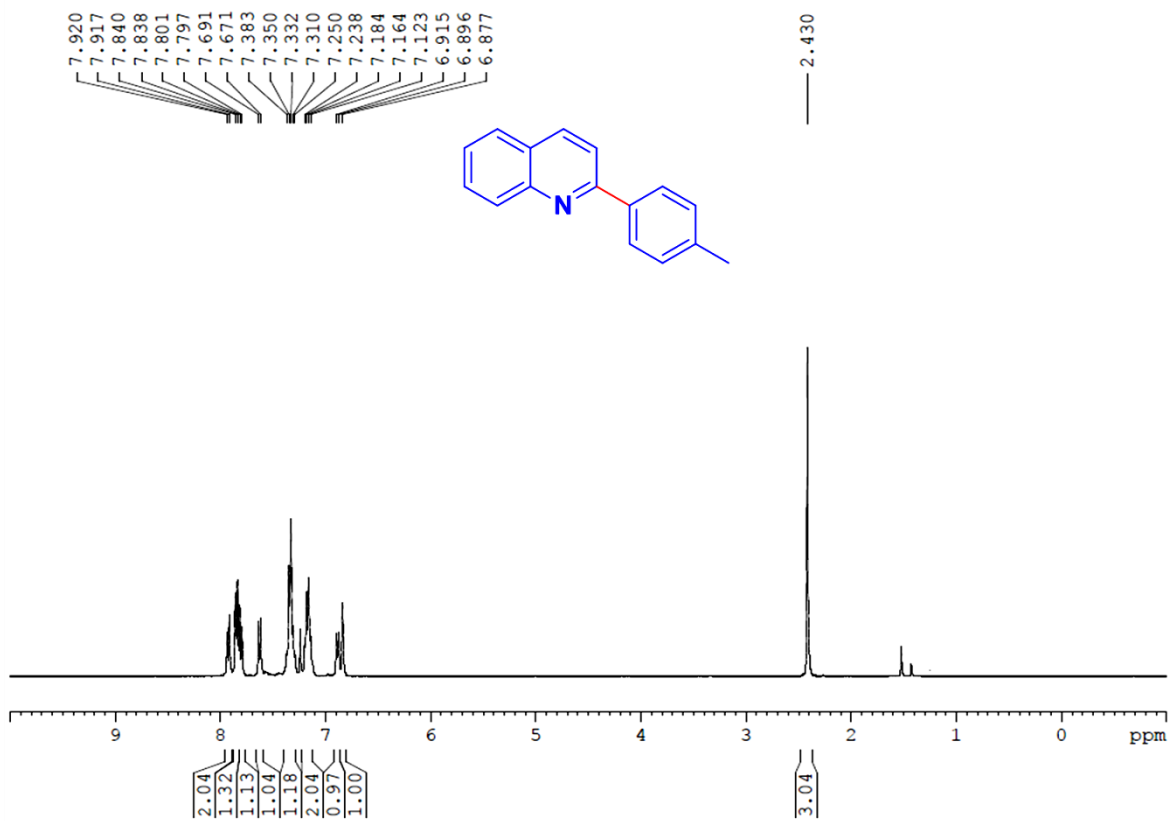

**Fig. 17.**  $^1\text{H NMR}$  spectrum of 2-*p*-tolylquinoline (1c)

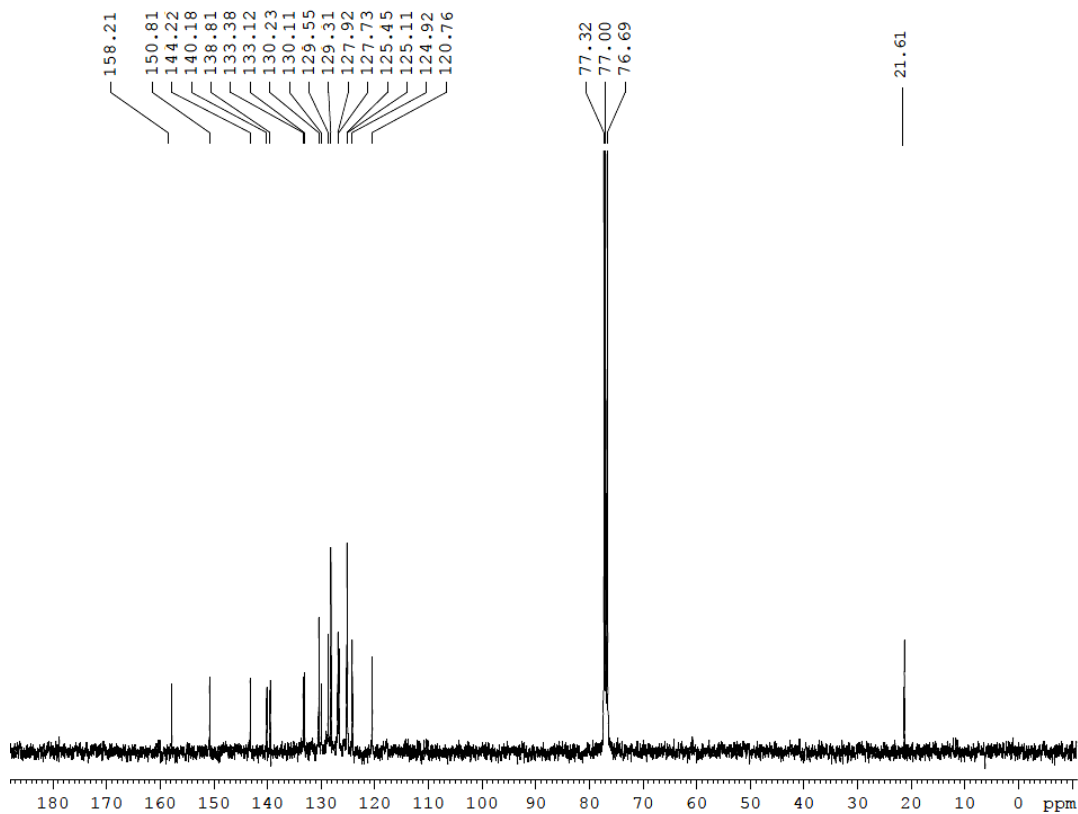

**Fig. 18.**  $^{13}\text{C NMR}$  spectrum of 2-*p*-tolylquinoline (1c)

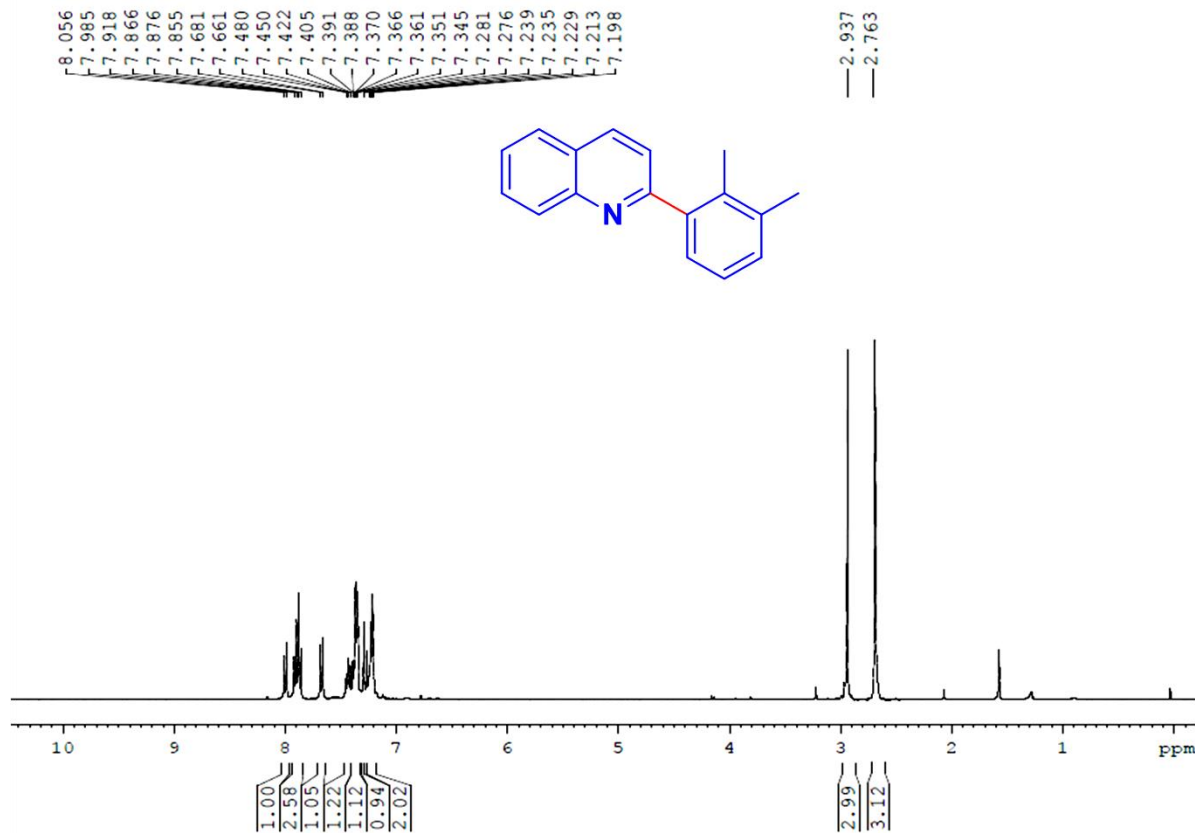

**Fig. 19.** <sup>1</sup>H NMR spectrum of 2-(2,3-dimethyl-phenyl)-quinoline (1d)

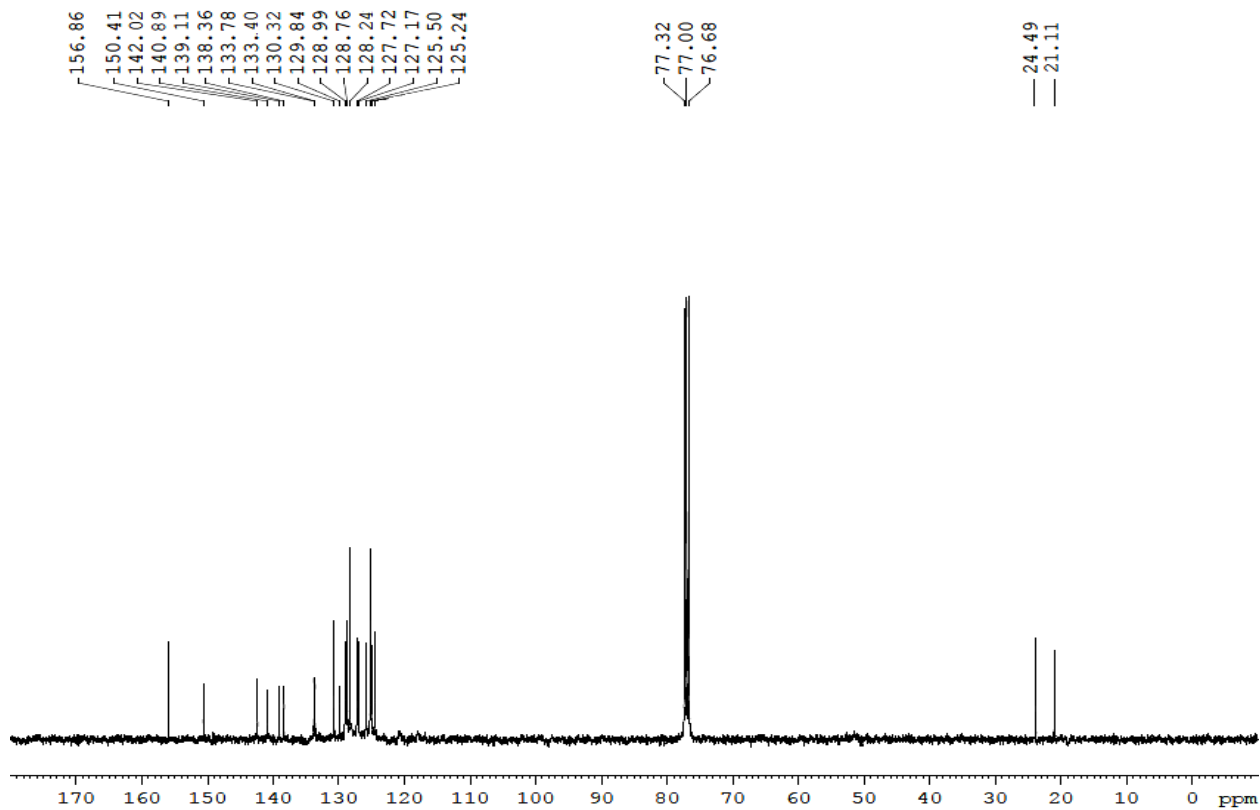

**Fig. 20.** <sup>13</sup>C NMR spectrum of 2-(2,3-dimethyl-phenyl)-quinoline (1d)

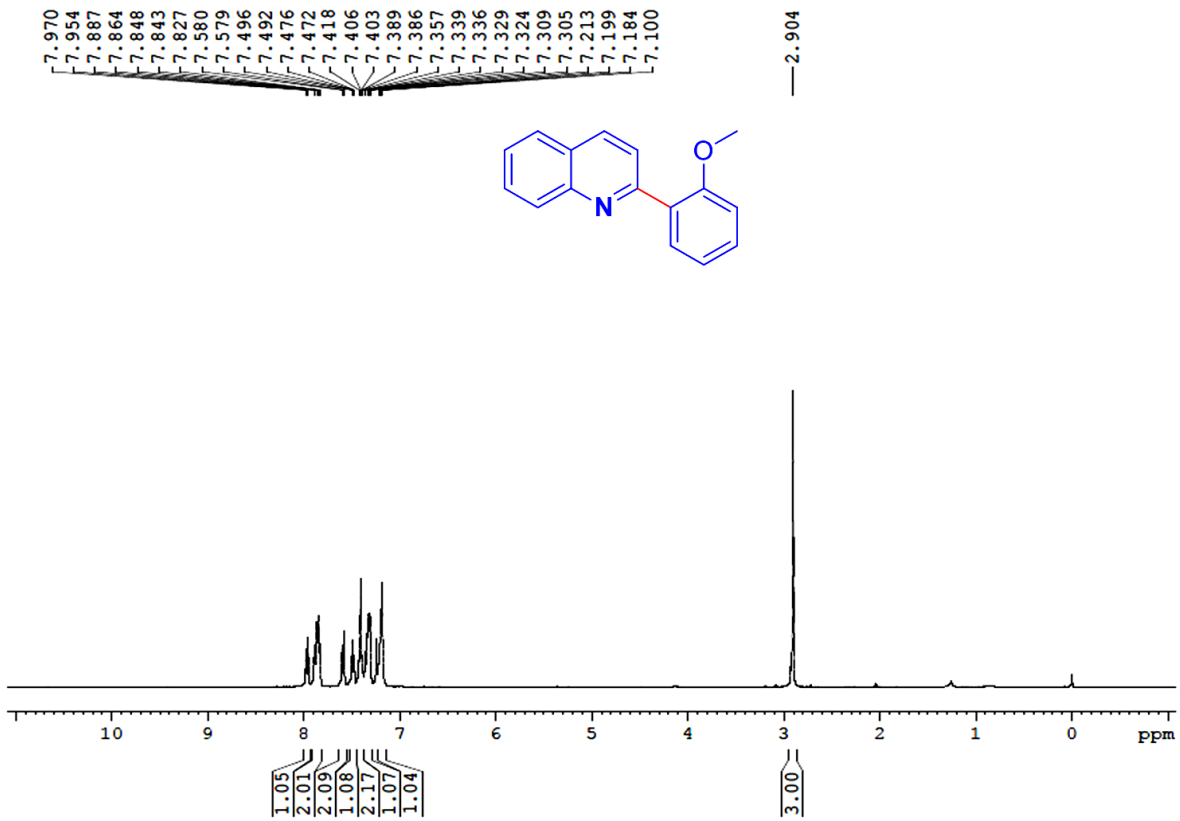

**Fig. 21.** <sup>1</sup>H NMR spectrum of 2-(2-methoxy-phenyl)-quinoline (1e)

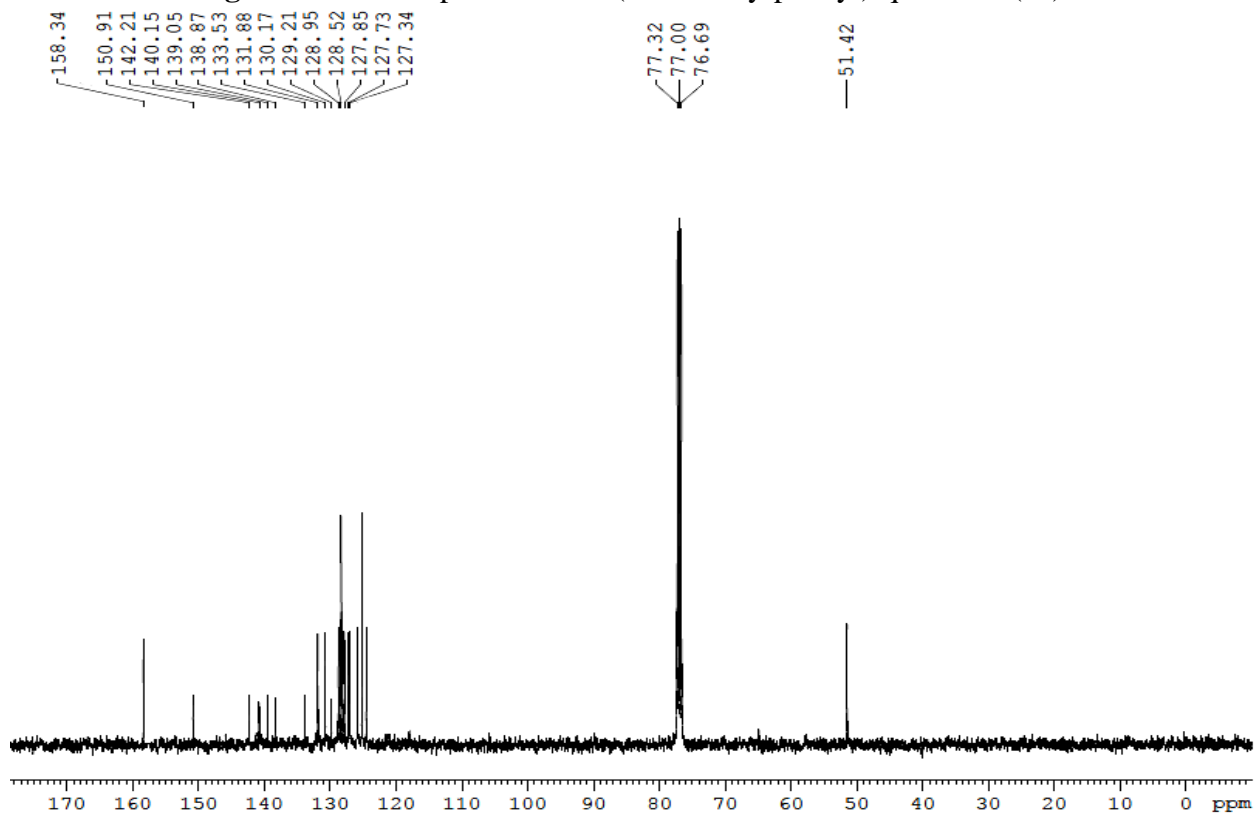

**Fig. 22.** <sup>13</sup>C NMR spectrum of 2-(2-methoxy-phenyl)-quinoline (1e)

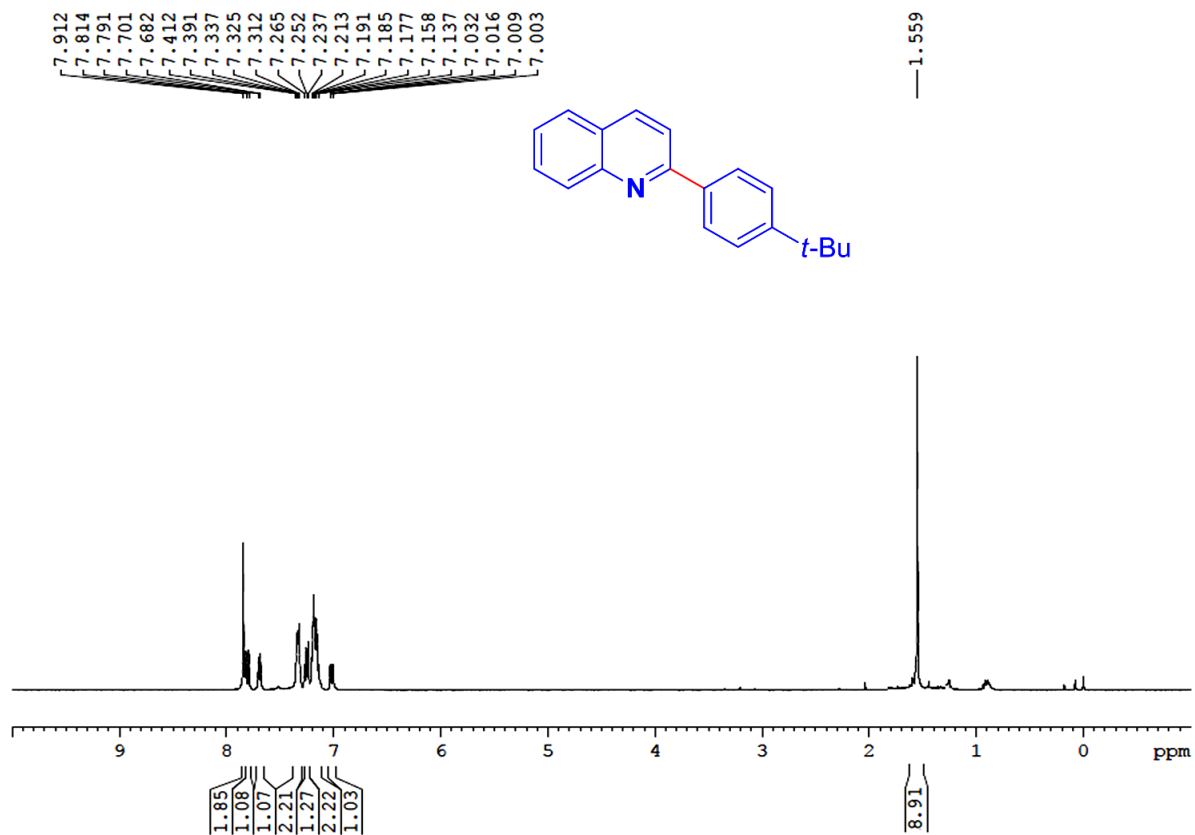

Fig. 23. <sup>1</sup>H NMR spectrum of 2-(4-*tert*-butyl-phenyl)-quinoline (1f)

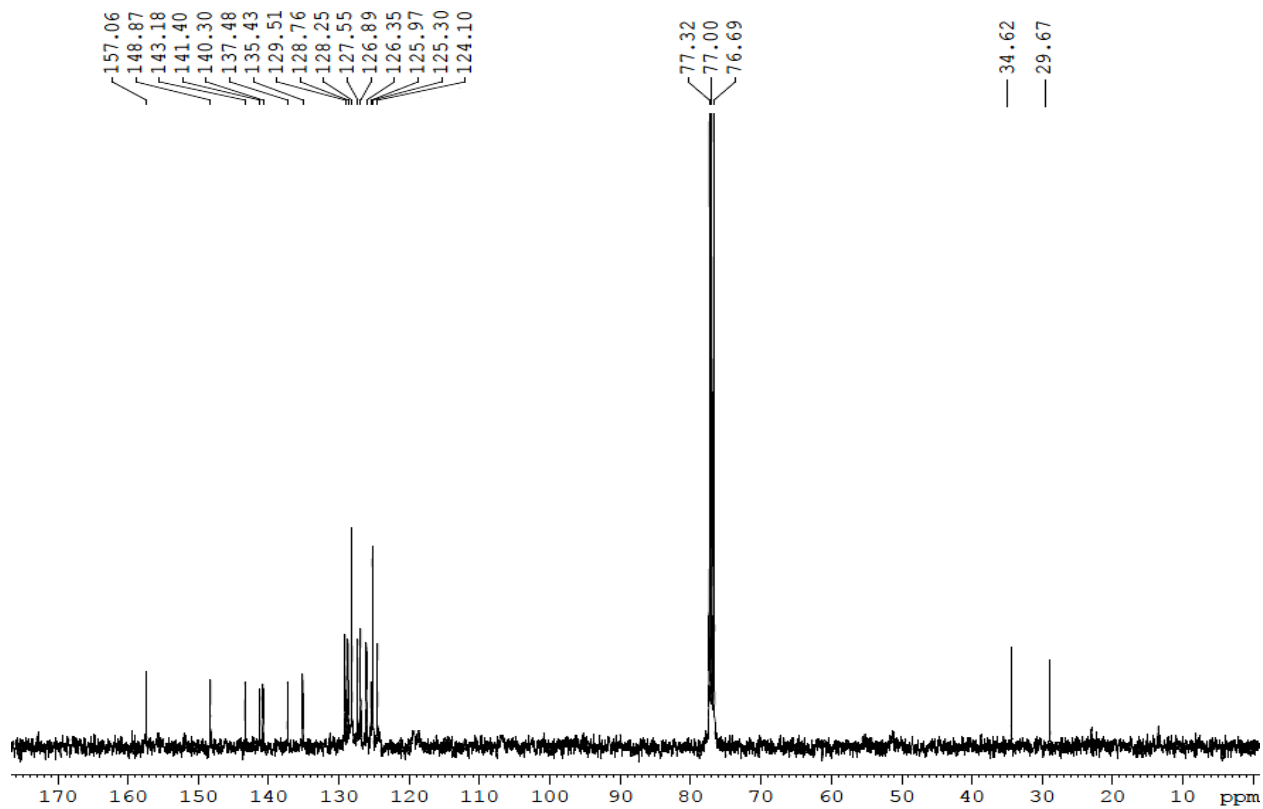

Fig. 24. <sup>13</sup>C NMR spectrum of 2-(4-*tert*-butyl-phenyl)-quinoline (1f)

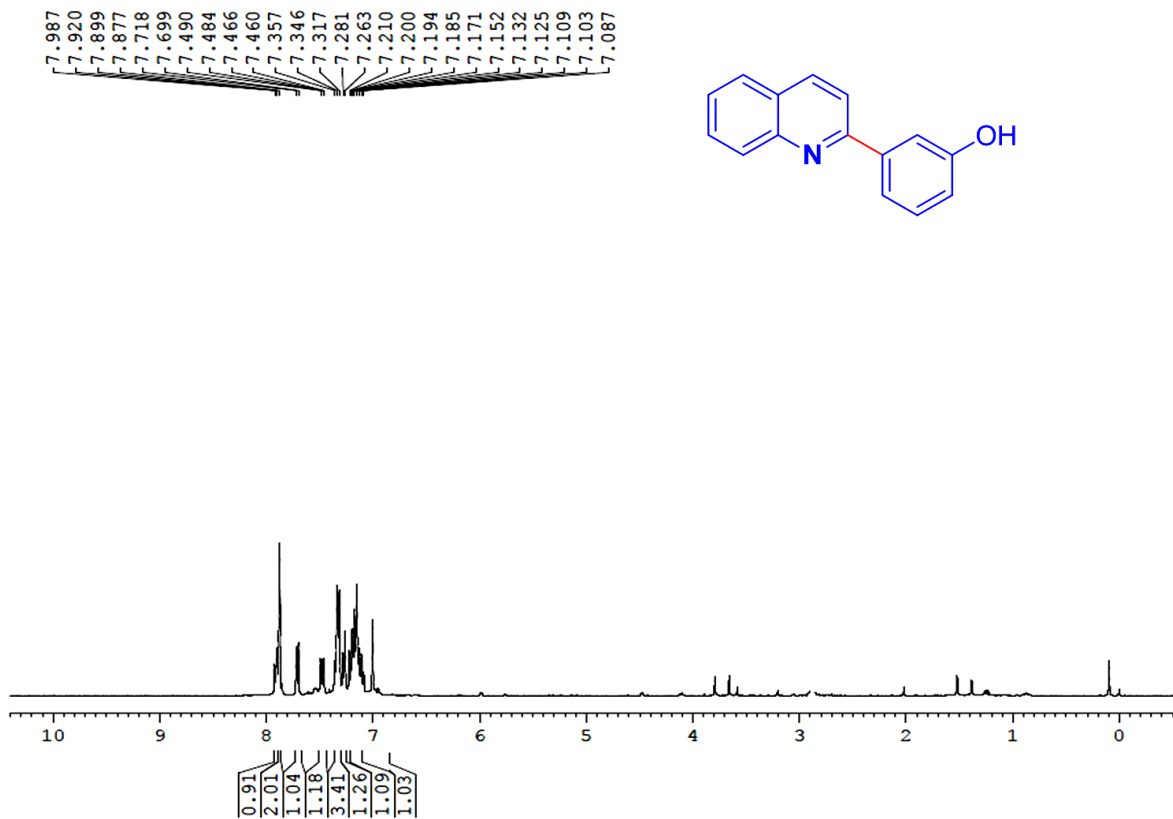

Fig. 25. <sup>1</sup>H NMR spectrum of 3-quinolin-2-yl-phenol (1g)

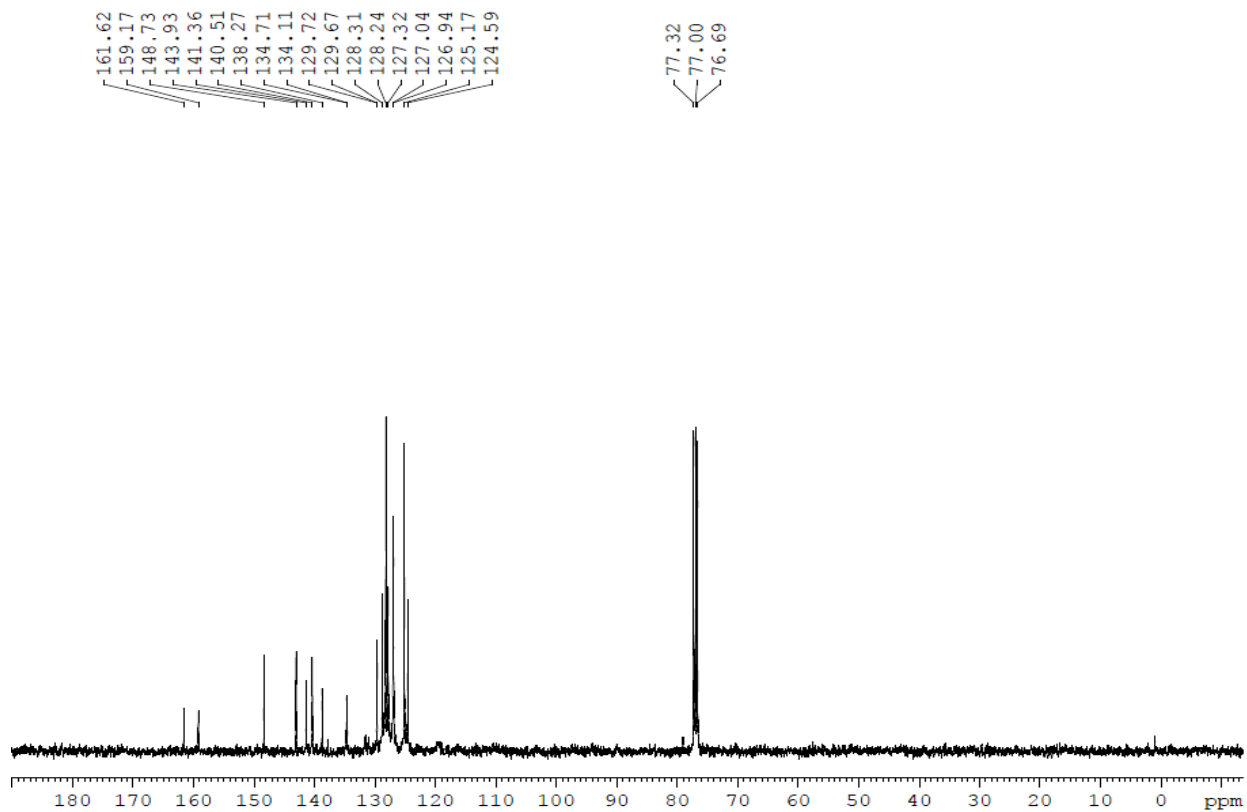

Fig. 26. <sup>13</sup>C NMR spectrum of 3-quinolin-2-yl-phenol (1g)

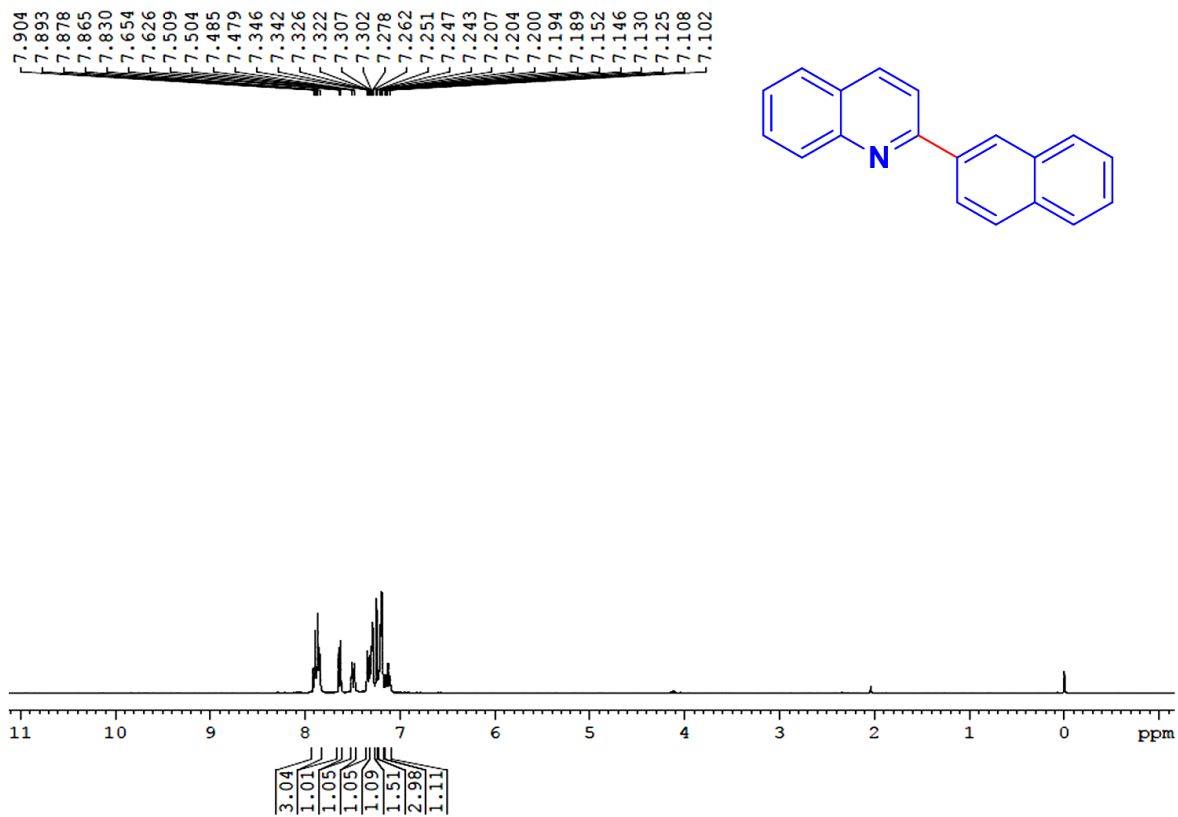

**Fig. 27.** <sup>1</sup>H NMR spectrum of 2-naphthalen-2-yl-quinoline (1h)

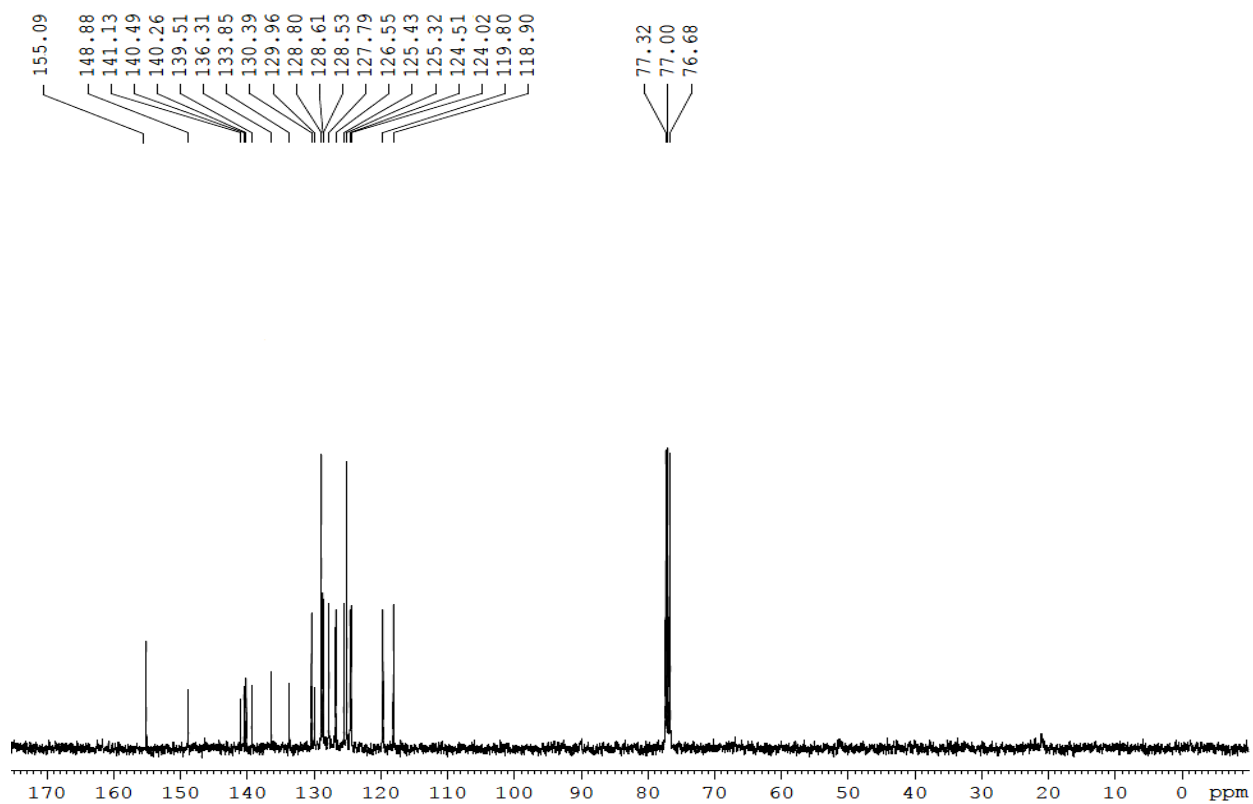

**Fig. 28.** <sup>13</sup>C NMR spectrum of 2-naphthalen-2-yl-quinoline (1h)

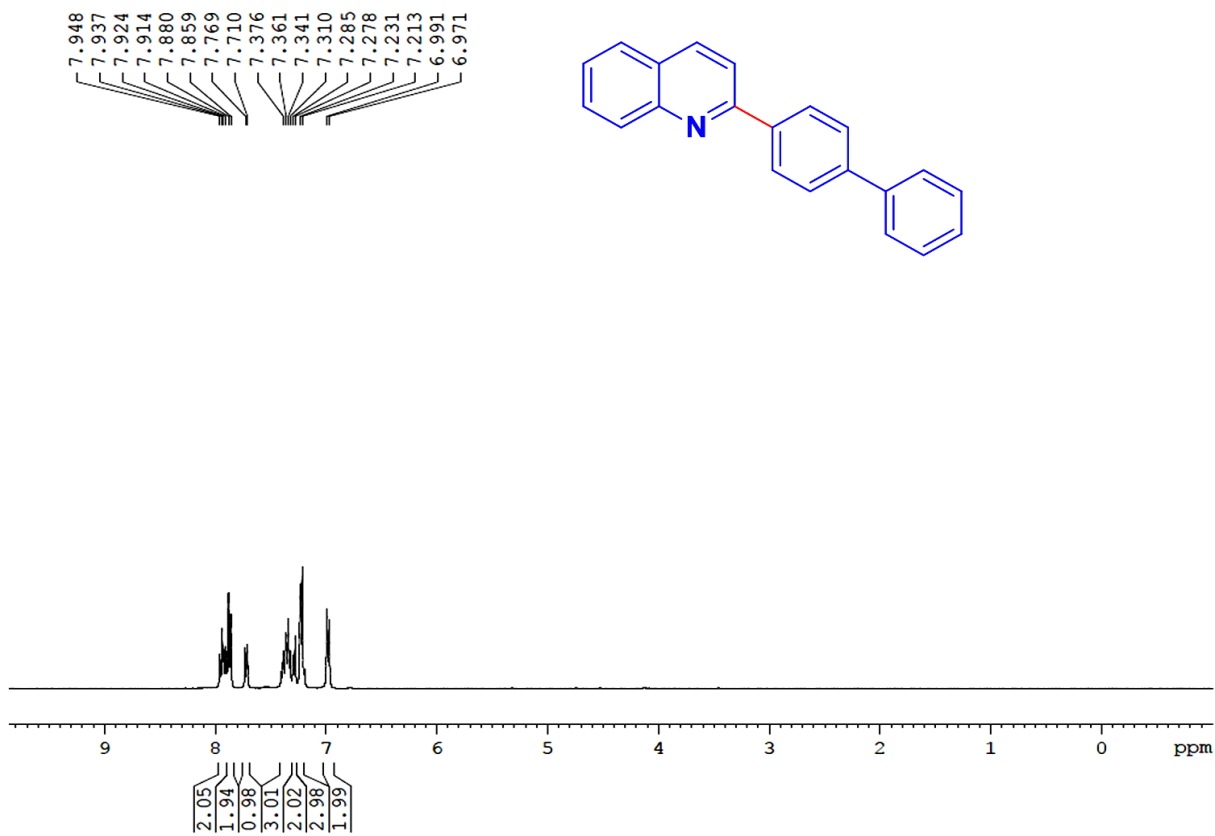

**Fig. 29.** <sup>1</sup>H NMR spectrum of 2-biphenyl-4-yl-quinoline (1i)

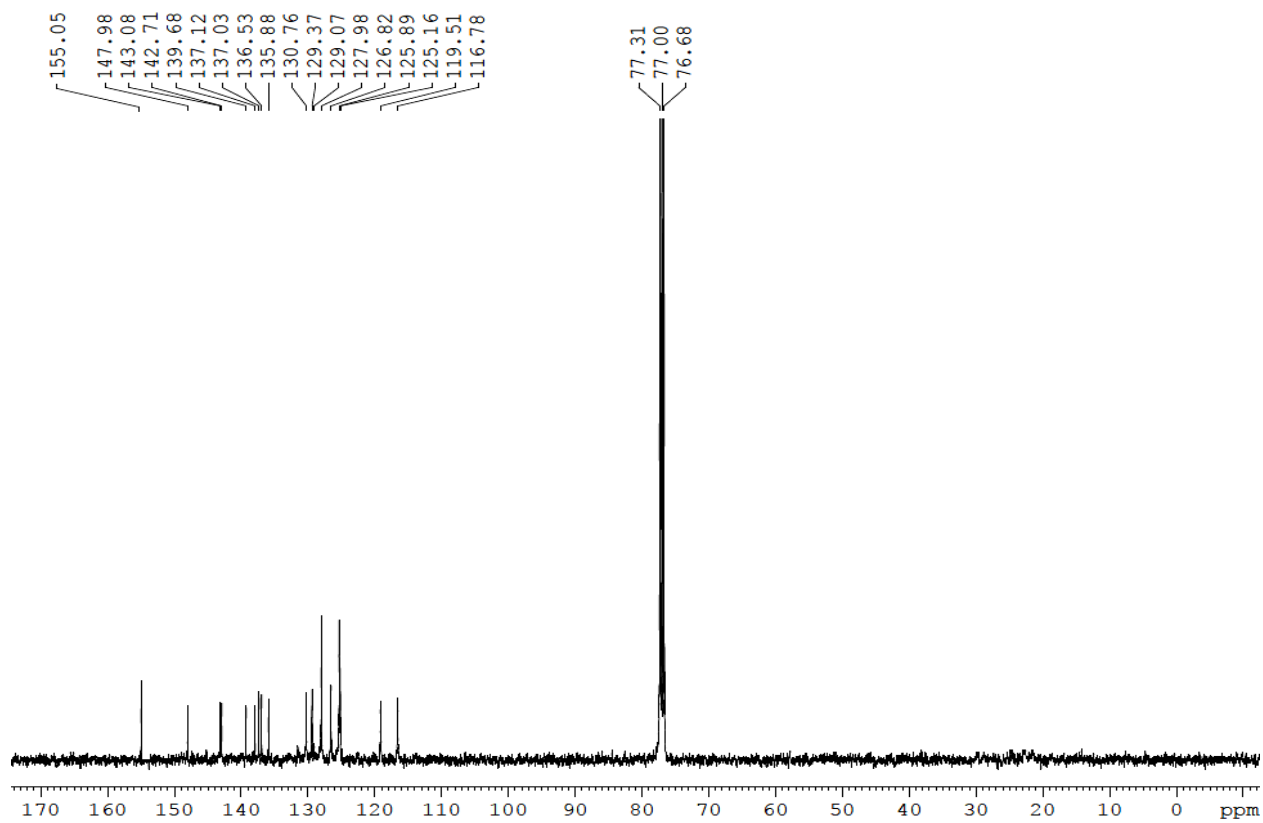

**Fig. 30.** <sup>13</sup>C NMR spectrum of 2-biphenyl-4-yl-quinoline (1i)



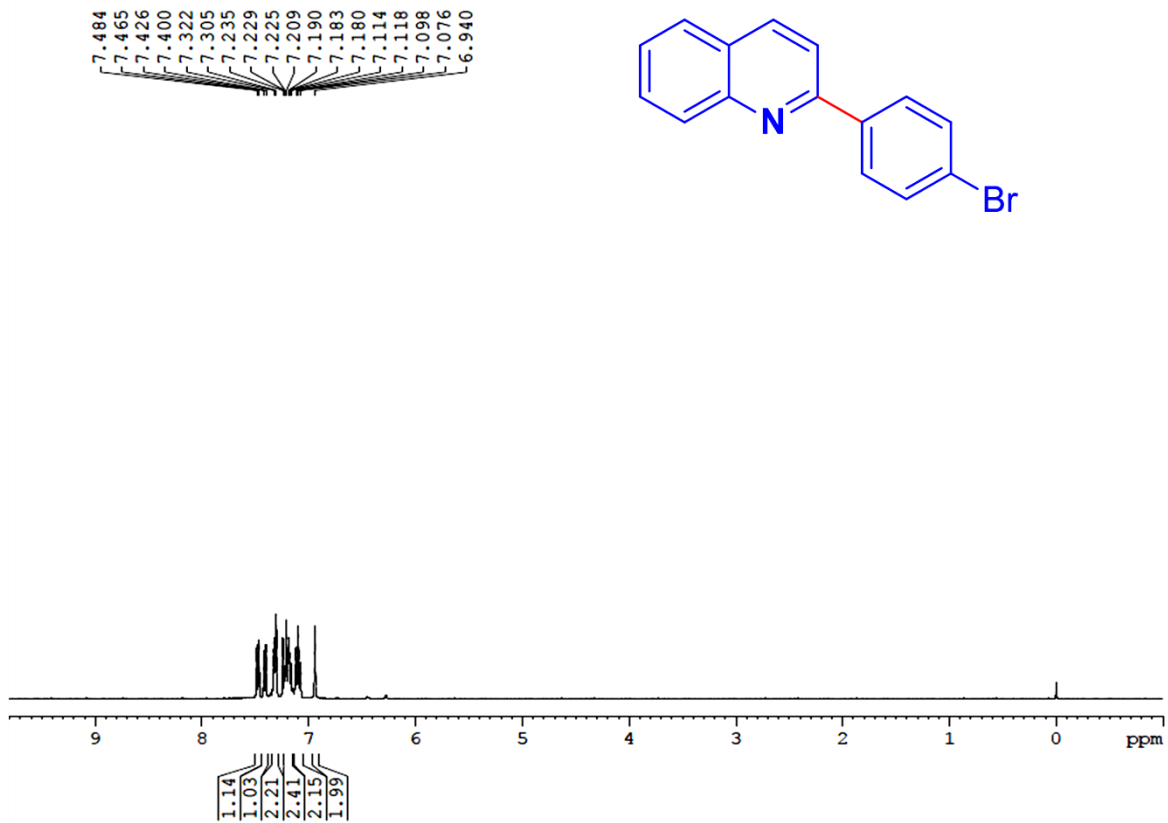

**Fig. 31.** <sup>1</sup>H NMR spectrum of 2-(4-bromo-phenyl)-quinoline (1j)

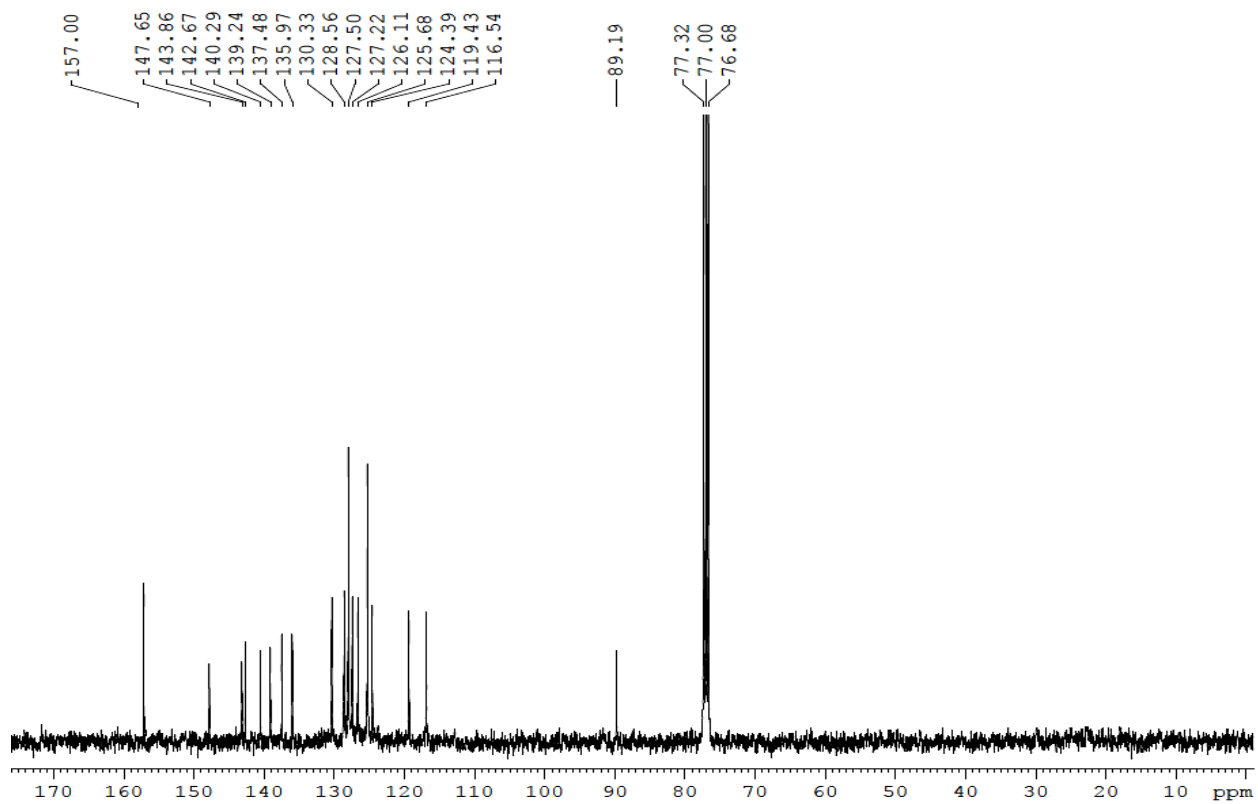

**Fig. 32.** <sup>13</sup>C NMR spectrum of 2-(4-bromo-phenyl)-quinoline (1j)

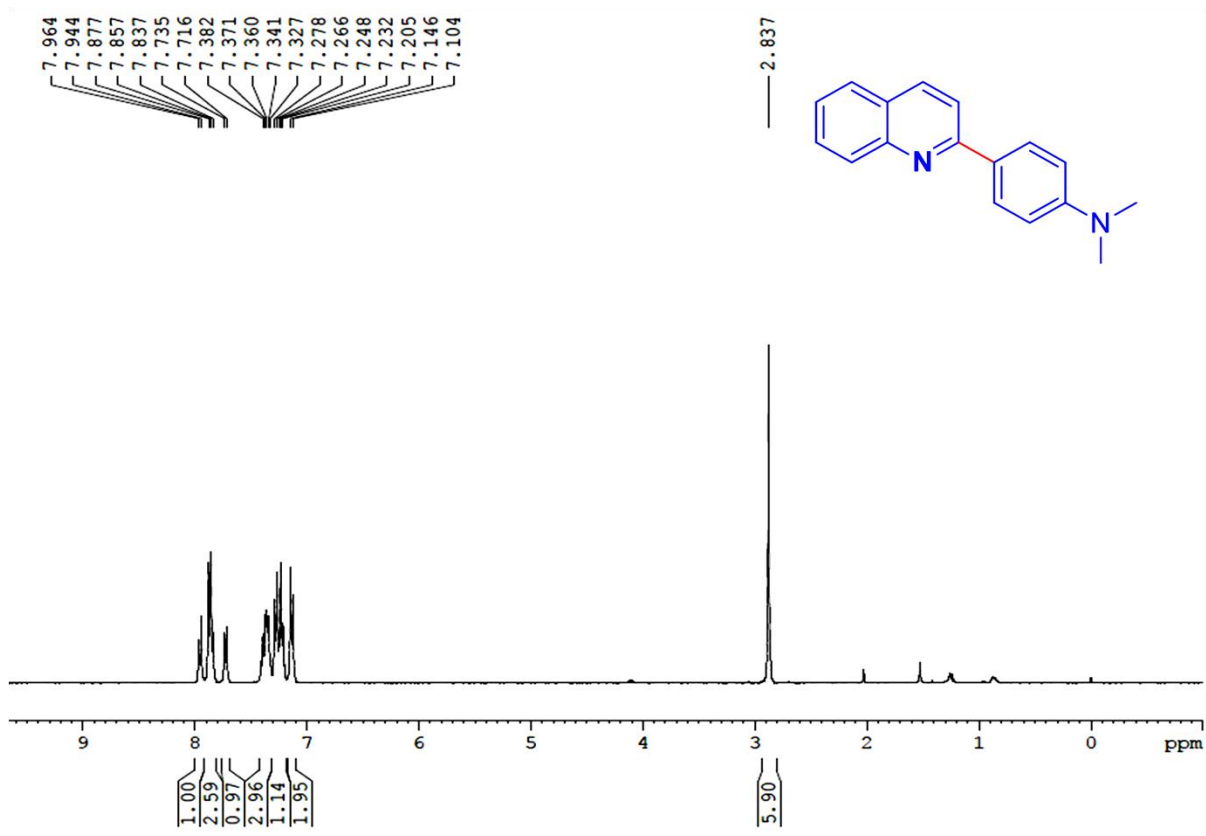

**Fig. 33.** <sup>1</sup>H NMR spectrum of dimethyl-(4-quinolin-2-yl-phenyl)-amine (1k)

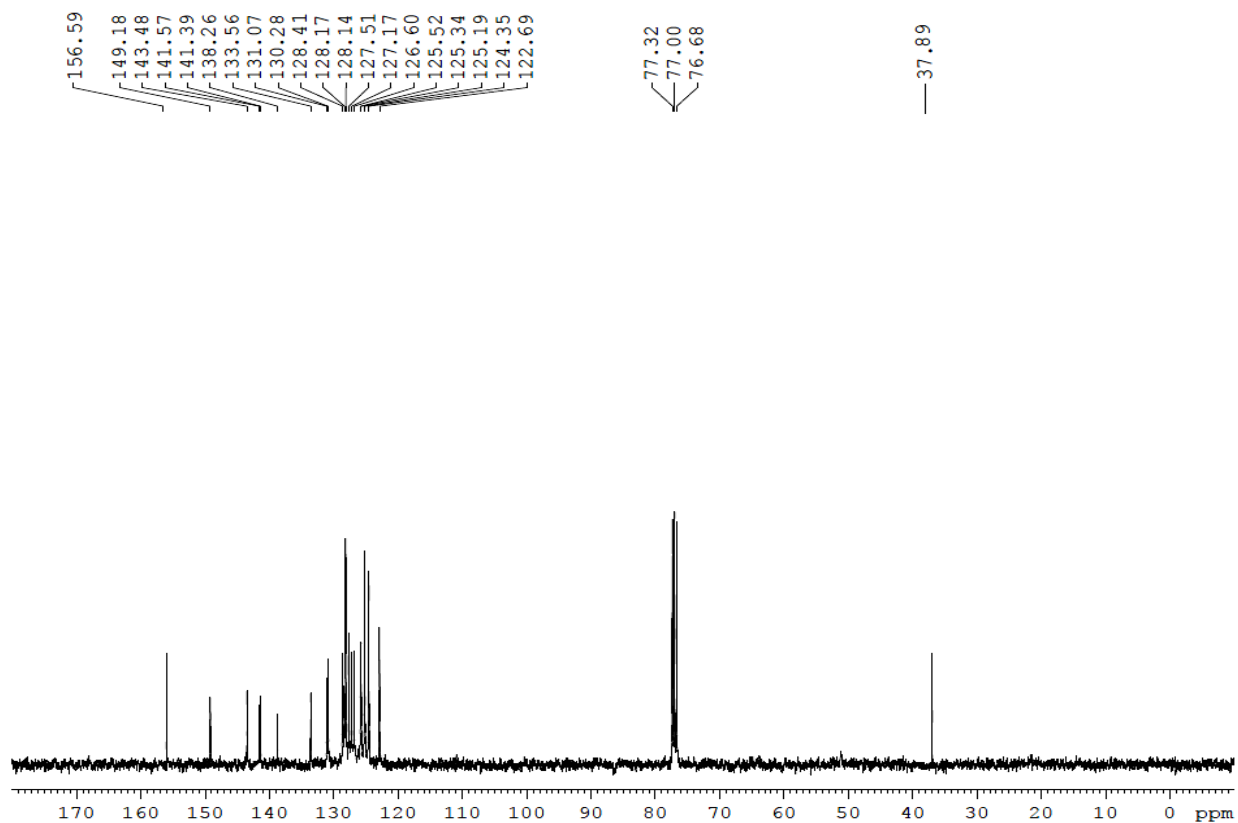

**Fig. 34.** <sup>13</sup>C NMR spectrum of dimethyl-(4-quinolin-2-yl-phenyl)-amine (1k)

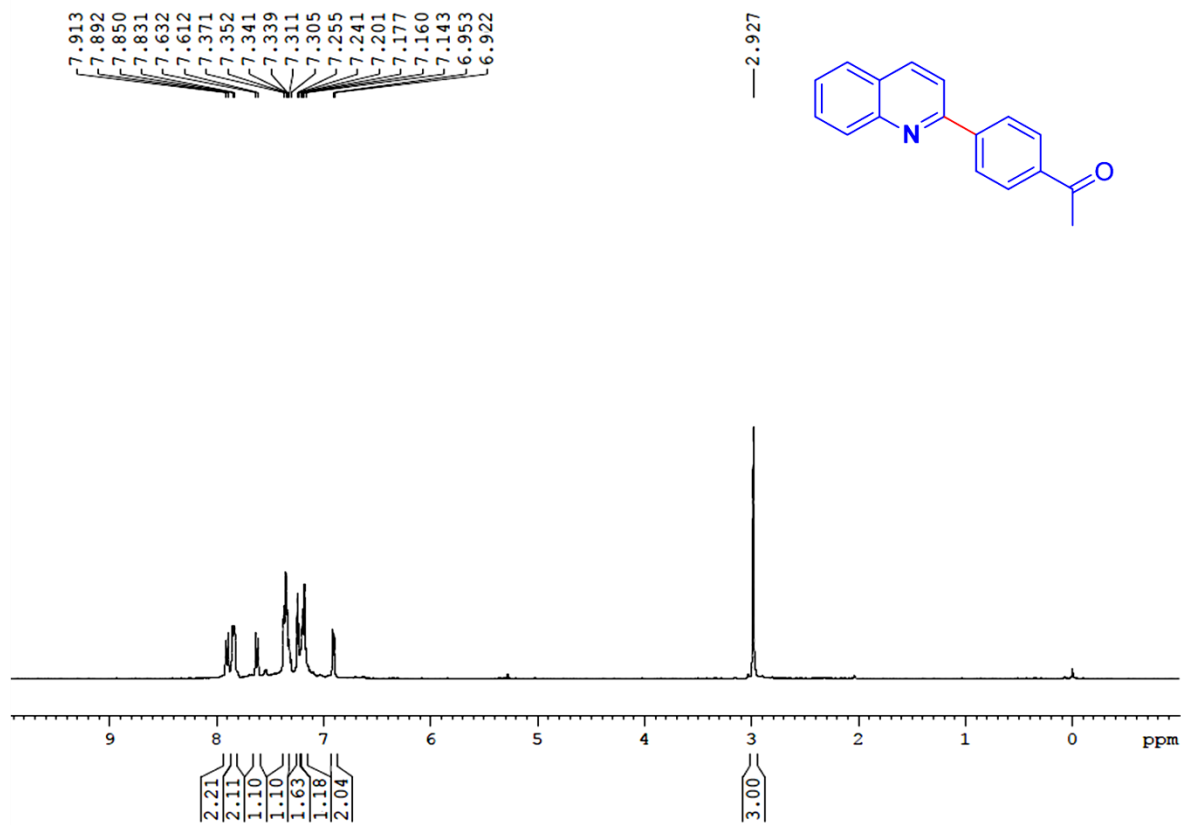

**Fig. 35.** <sup>1</sup>H NMR spectrum of 1-(4-quinolin-2-yl-phenyl)-ethanone (1I)

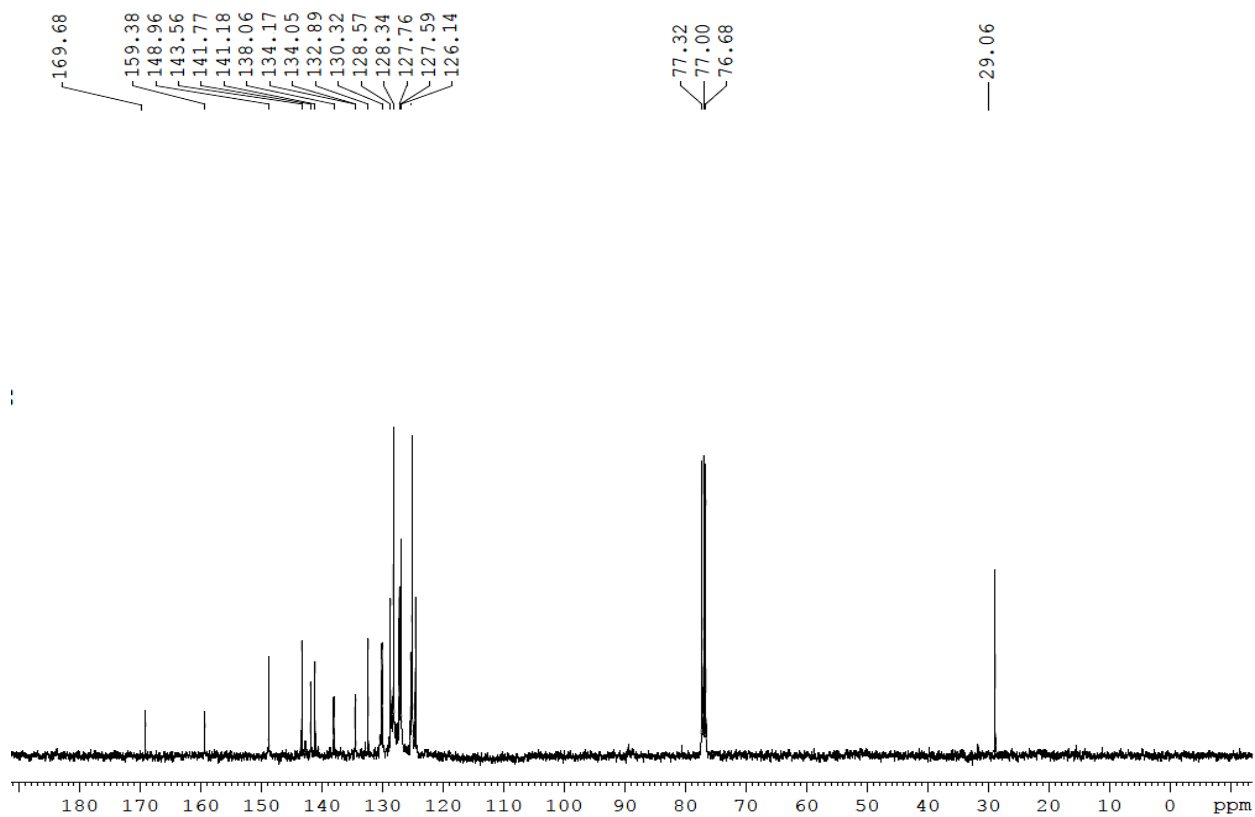

**Fig. 36.** <sup>13</sup>C NMR spectrum of 1-(4-quinolin-2-yl-phenyl)-ethanone (1I)

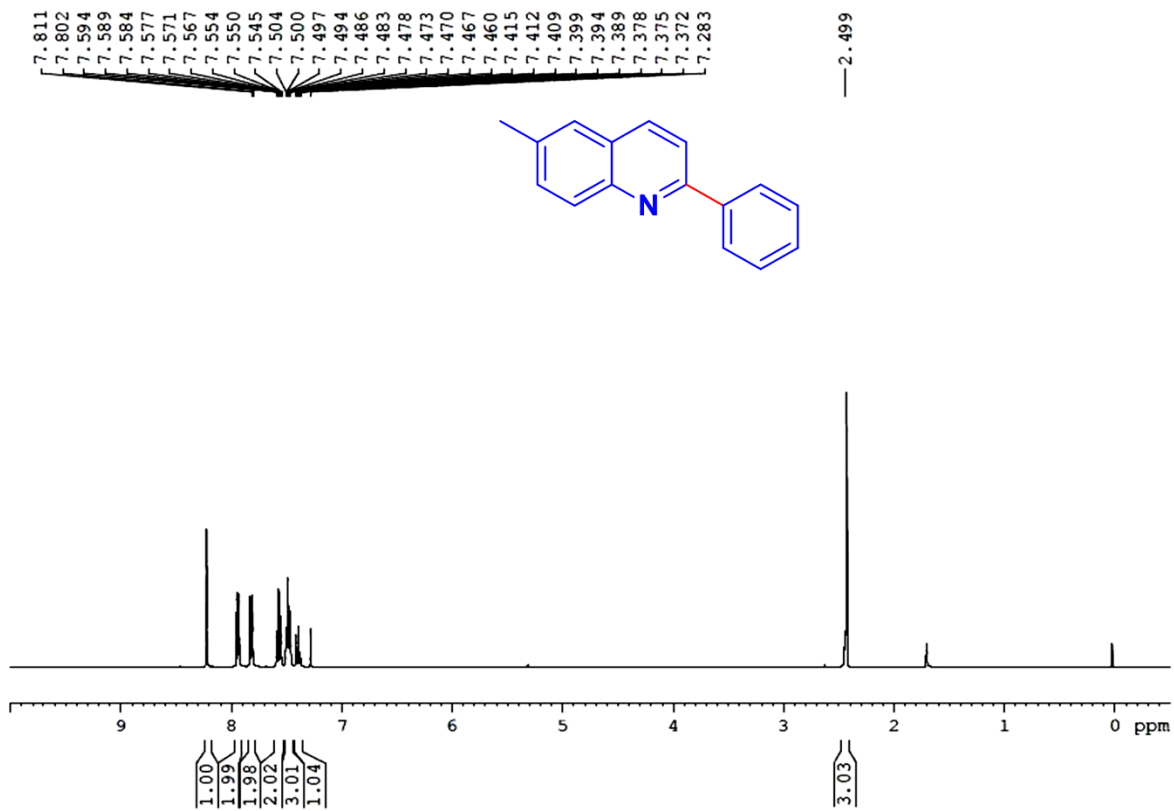

**Fig. 37.** <sup>1</sup>H NMR spectrum of 6-methyl-2-phenyl-quinoline (2a)

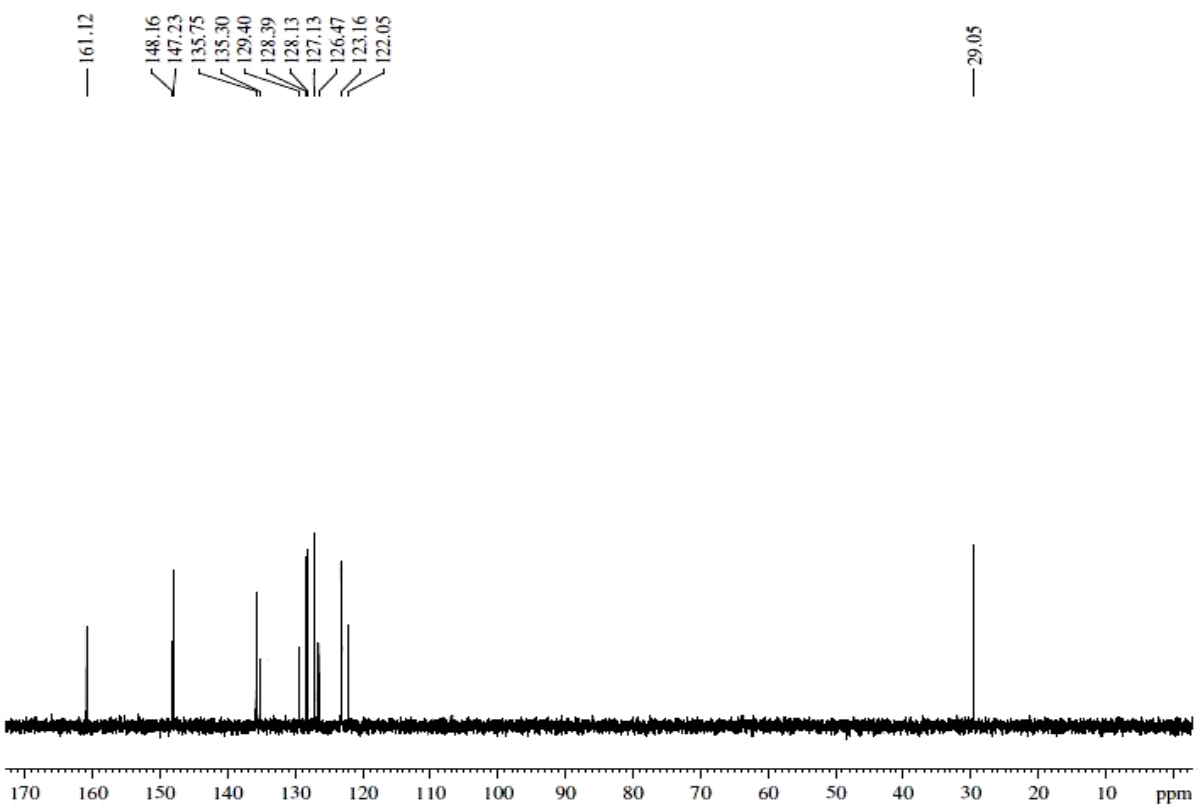

**Fig. 38.** <sup>13</sup>C NMR spectrum of 6-methyl-2-phenyl-quinoline (2a)

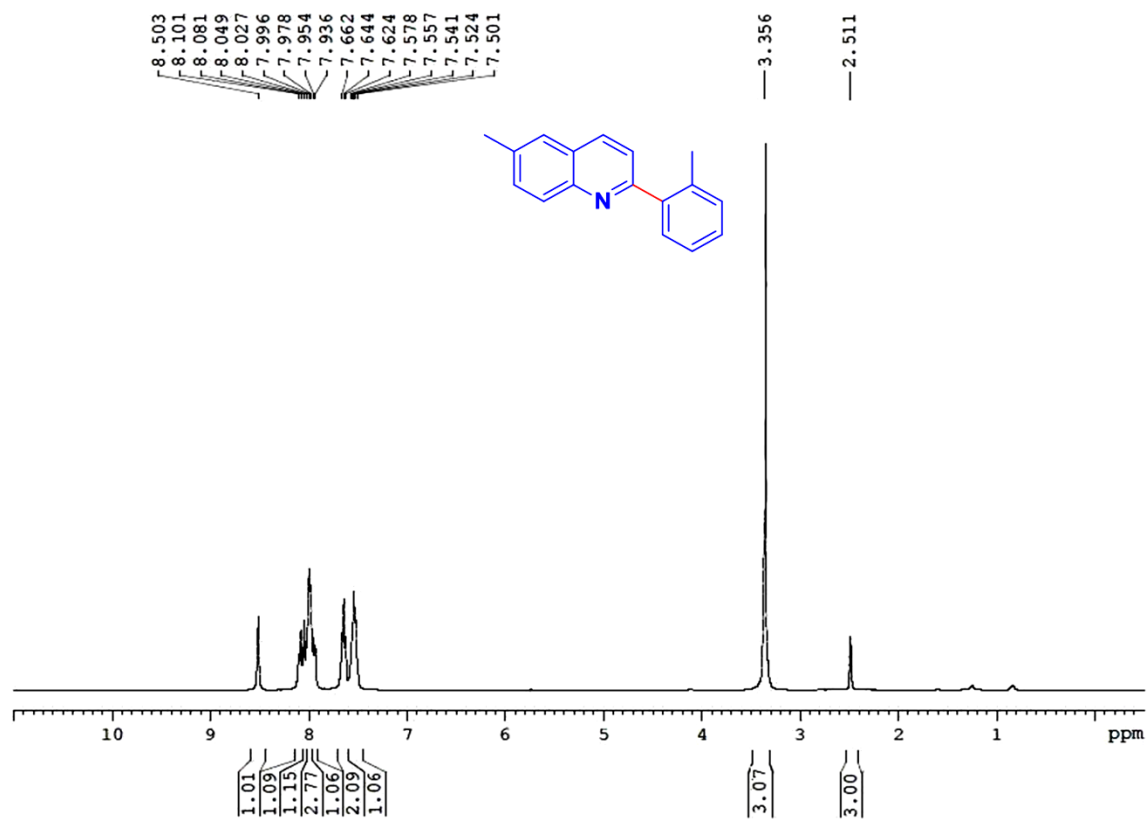

**Fig. 39.**  $^1\text{H}$  NMR spectrum of 6-methyl-2-*o*-tolyl-quinoline (2b)

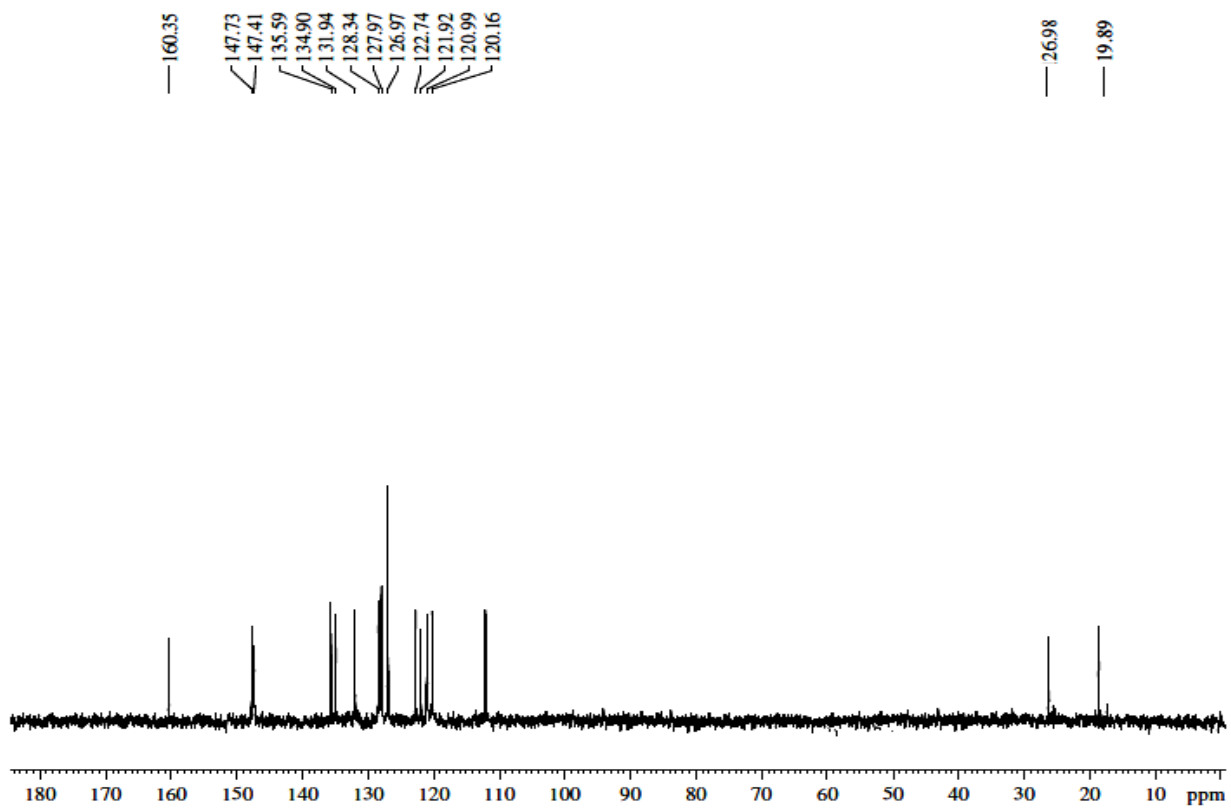

**Fig. 40.**  $^{13}\text{C}$  NMR spectrum of 6-methyl-2-*o*-tolyl-quinoline (2b)

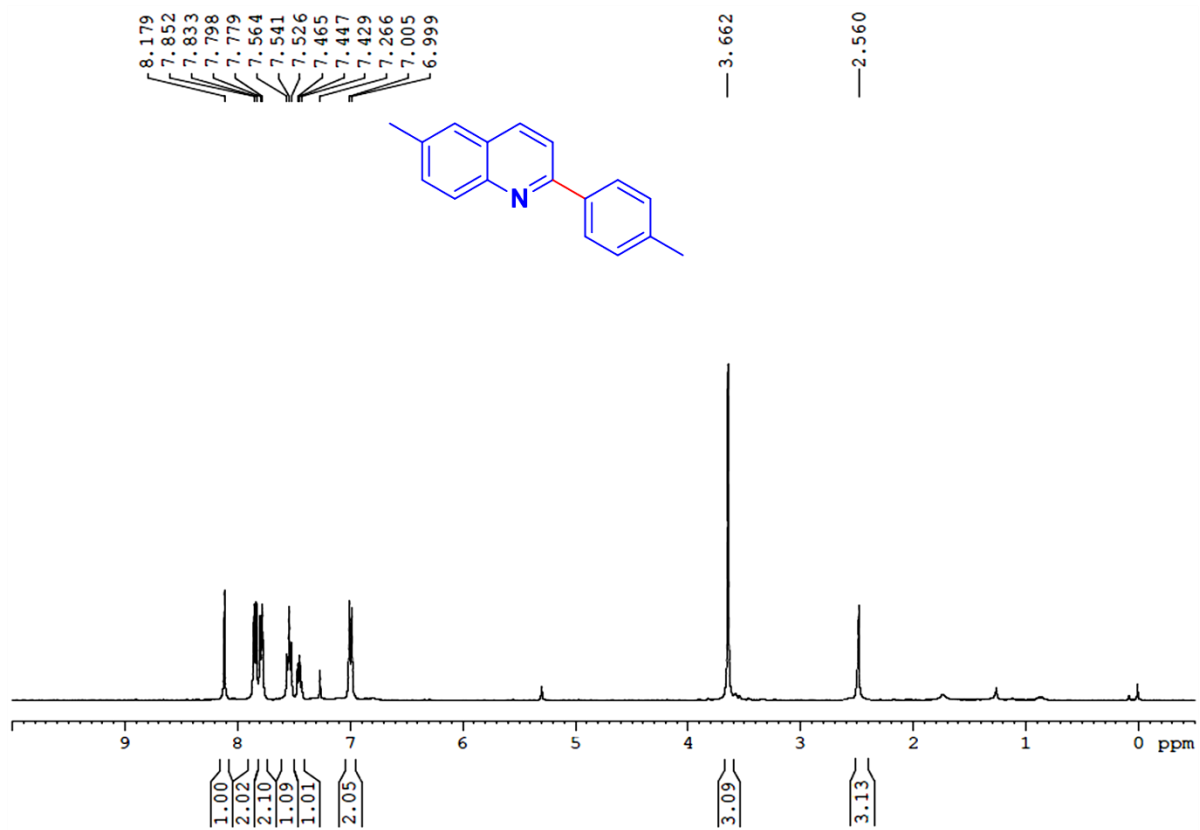

**Fig. 41.**  $^1\text{H}$  NMR spectrum of 6-methyl-2-*p*-tolyl-quinoline (2c)

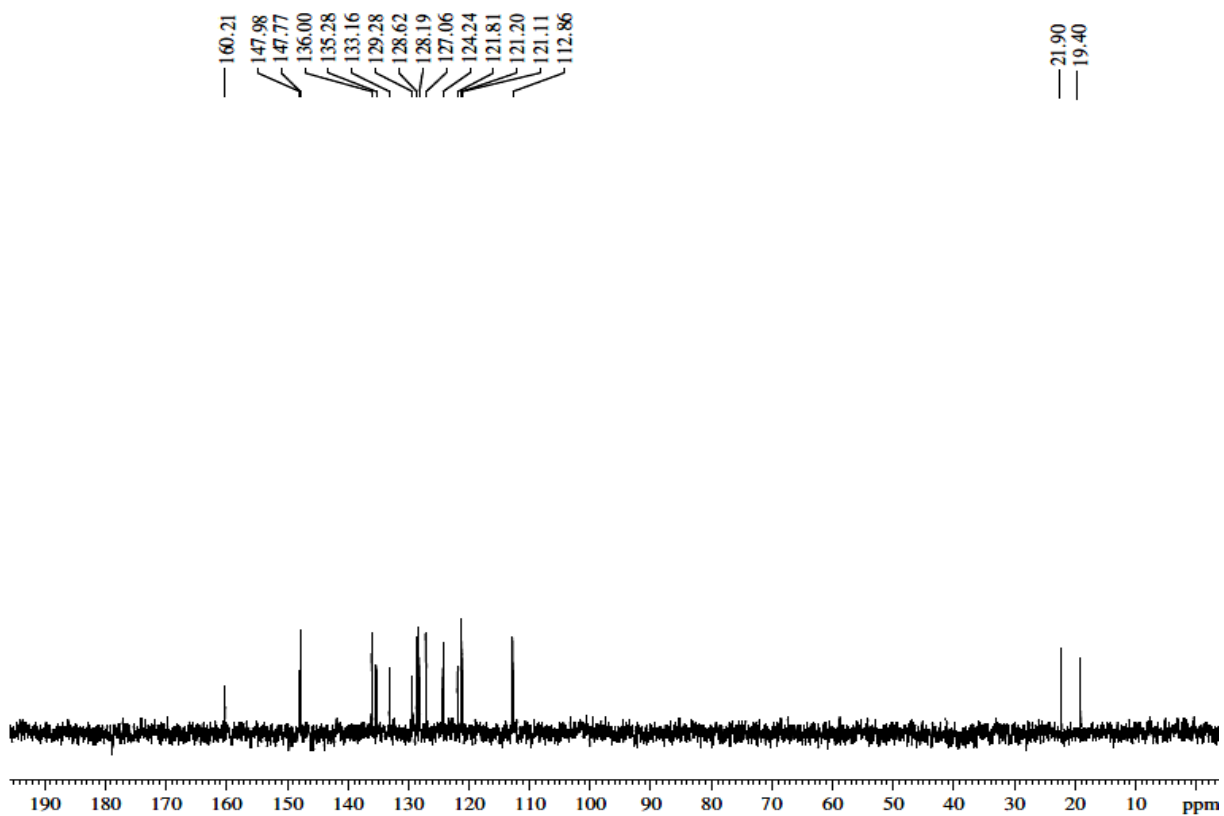

**Fig. 42.**  $^{13}\text{C}$  NMR spectrum of 6-methyl-2-*p*-tolyl-quinoline (2c)

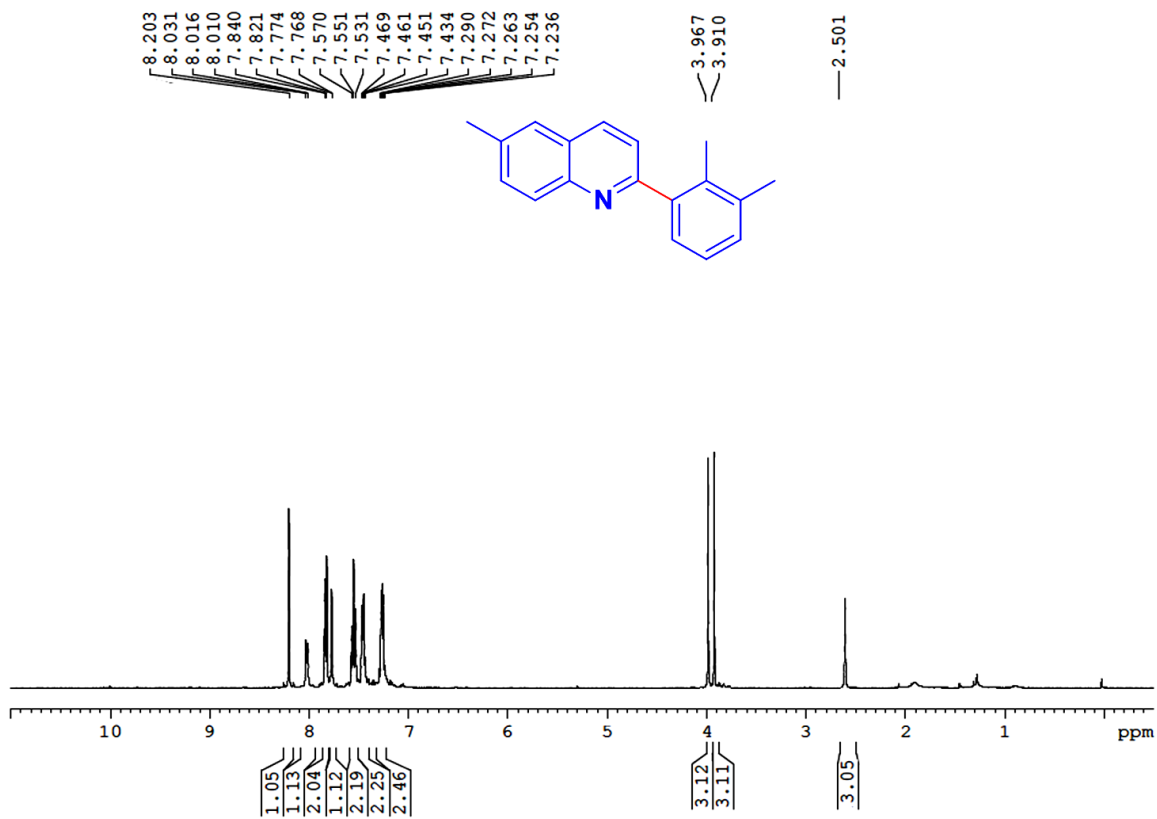

**Fig. 43.** <sup>1</sup>H NMR spectrum of 2-(2, 3-dimethyl-phenyl)-6-methyl-quinoline (2d)

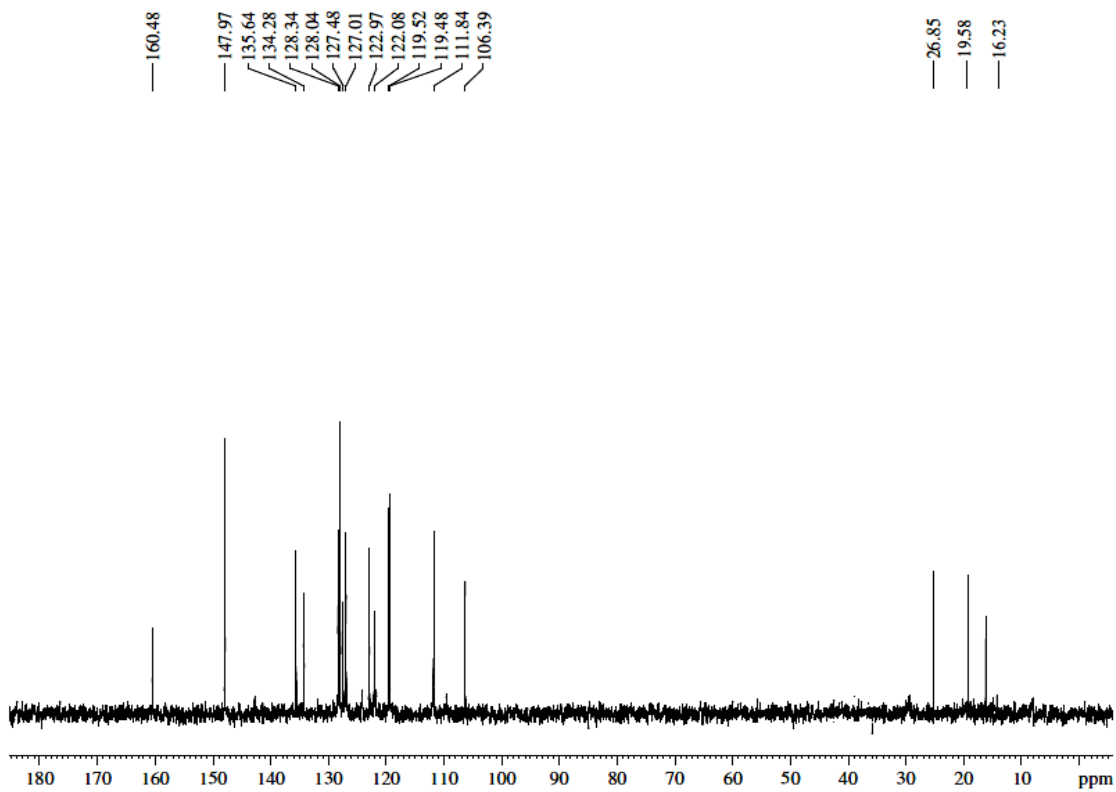

**Fig. 44.** <sup>13</sup>C NMR spectrum of 2-(2, 3-dimethyl-phenyl)-6-methyl-quinoline (2d)

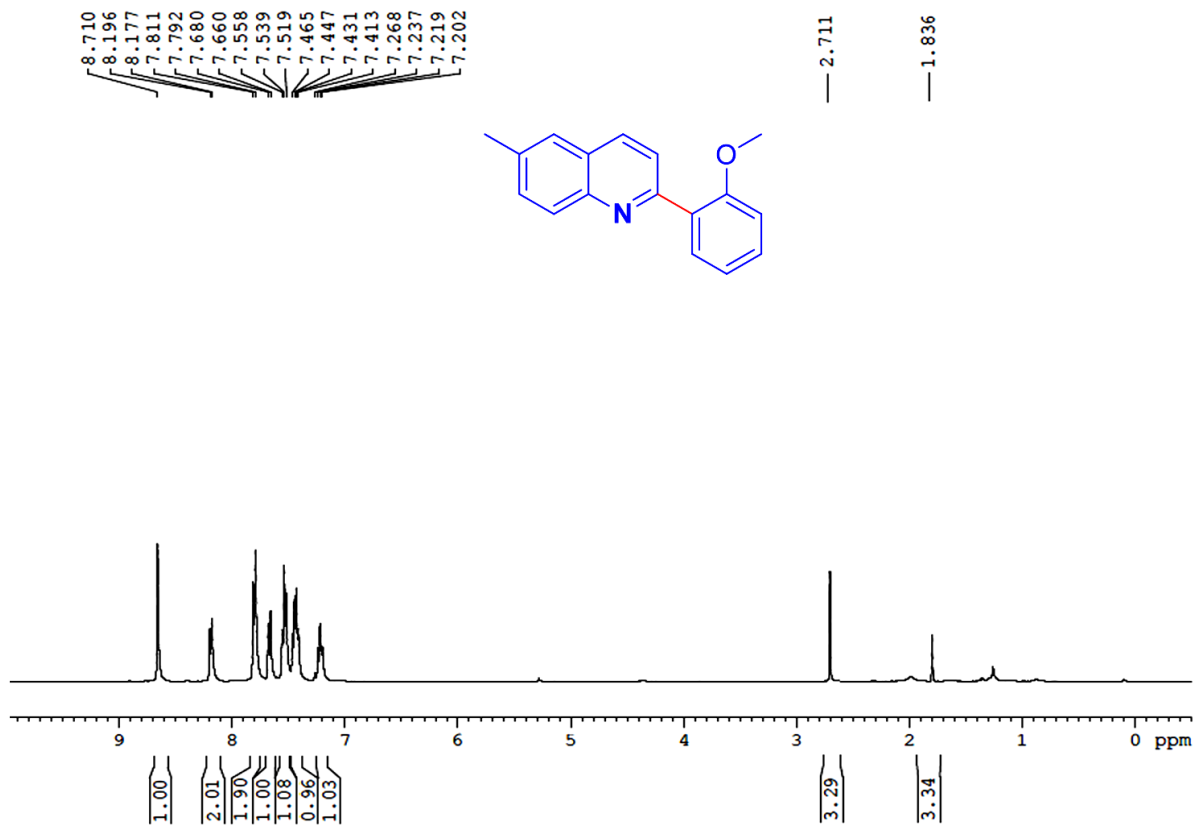

**Fig. 45.** <sup>1</sup>H NMR spectrum of 2-(2-methoxy-phenyl)-6-methyl-quinoline (2e)

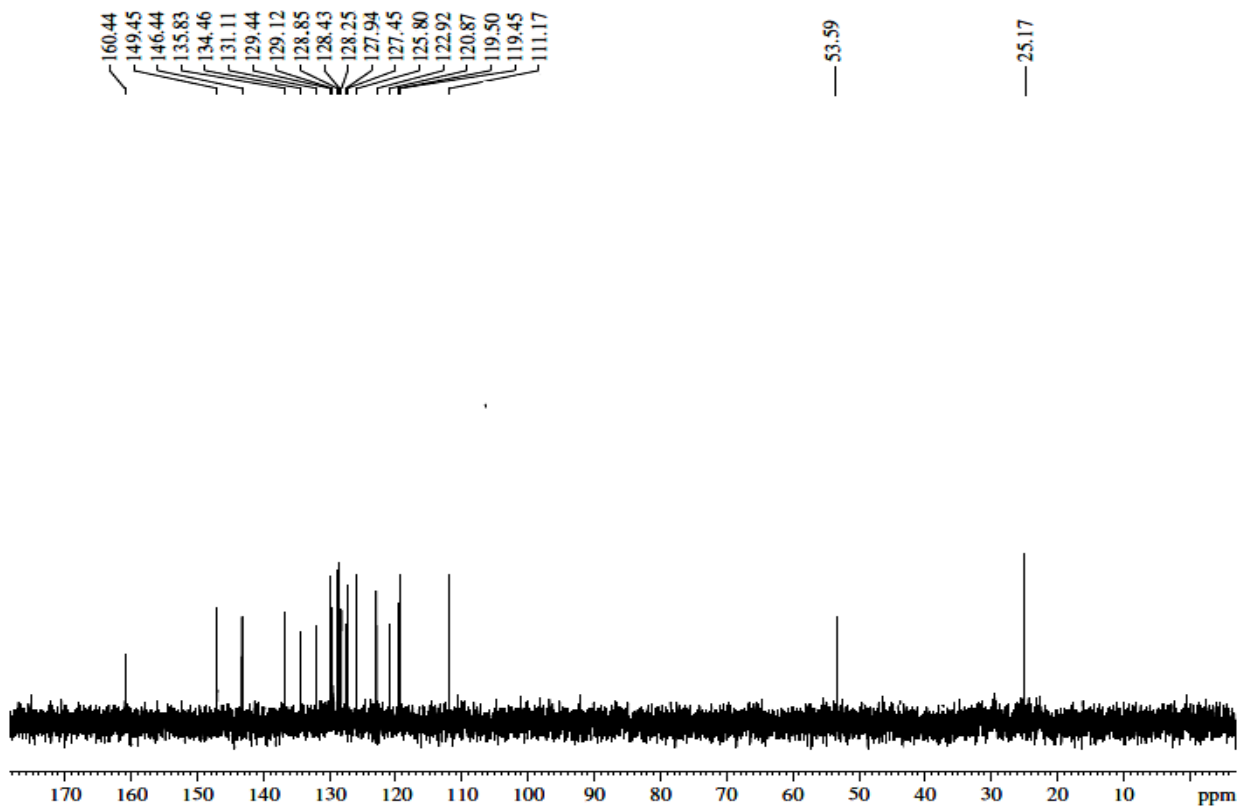

**Fig. 46.** <sup>13</sup>C NMR spectrum of 2-(2-methoxy-phenyl)-6-methyl-quinoline (2e)



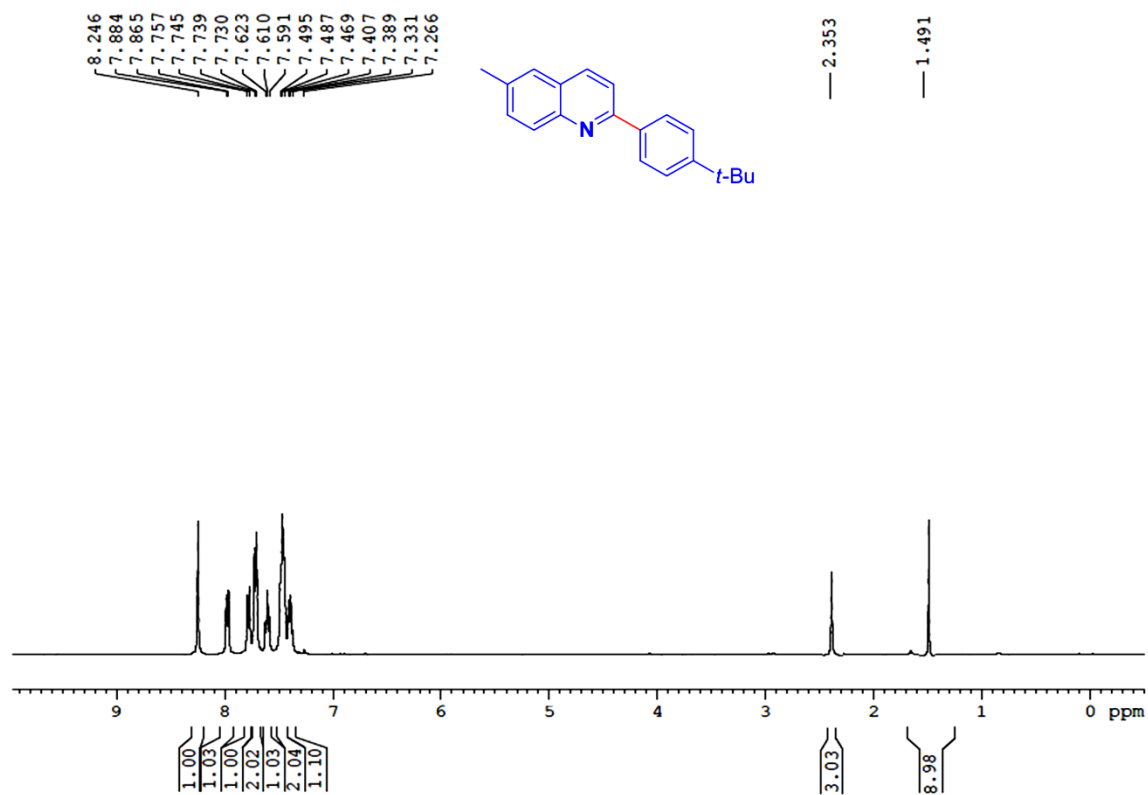

**Fig. 47.** <sup>1</sup>H NMR spectrum of 2-(4-*tert*-butyl-phenyl)-6-methyl-quinoline (2f)

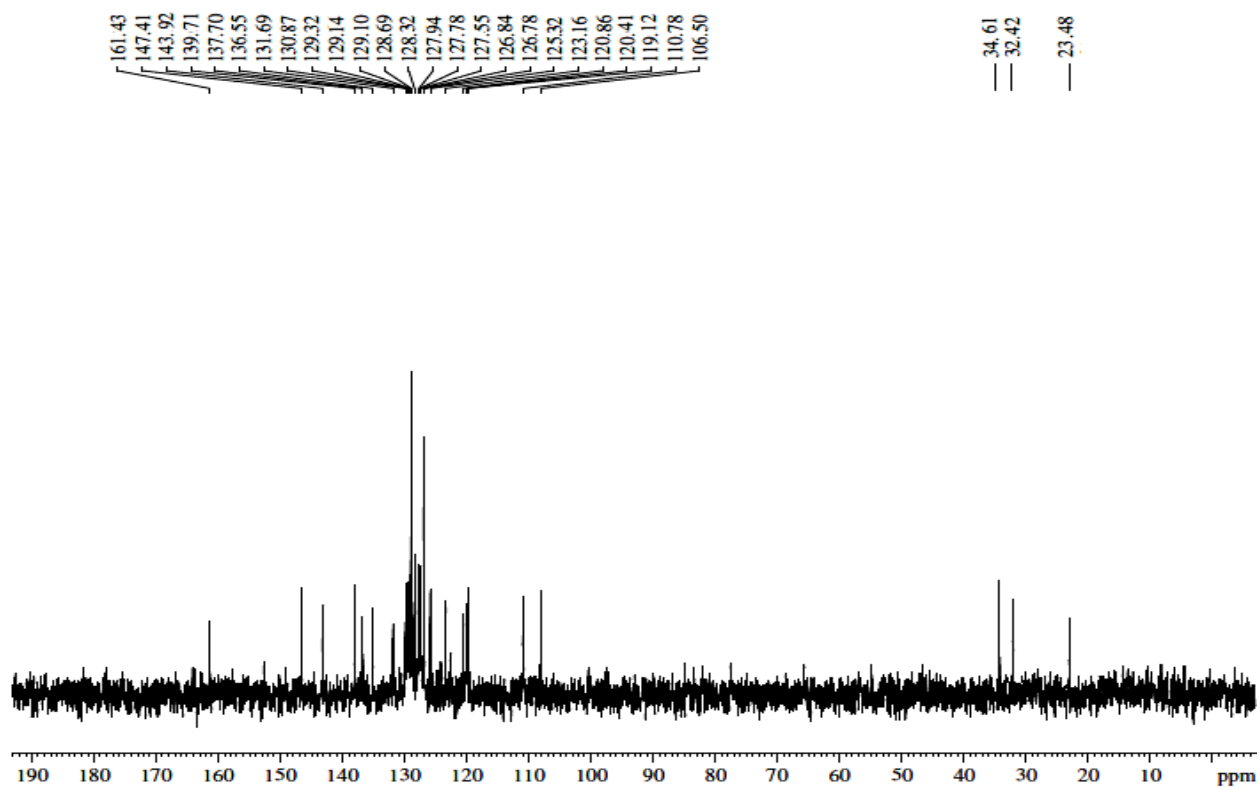

**Fig. 48.** <sup>13</sup>C NMR spectrum of 2-(4-*tert*-butyl-phenyl)-6-methyl-quinoline (2f)

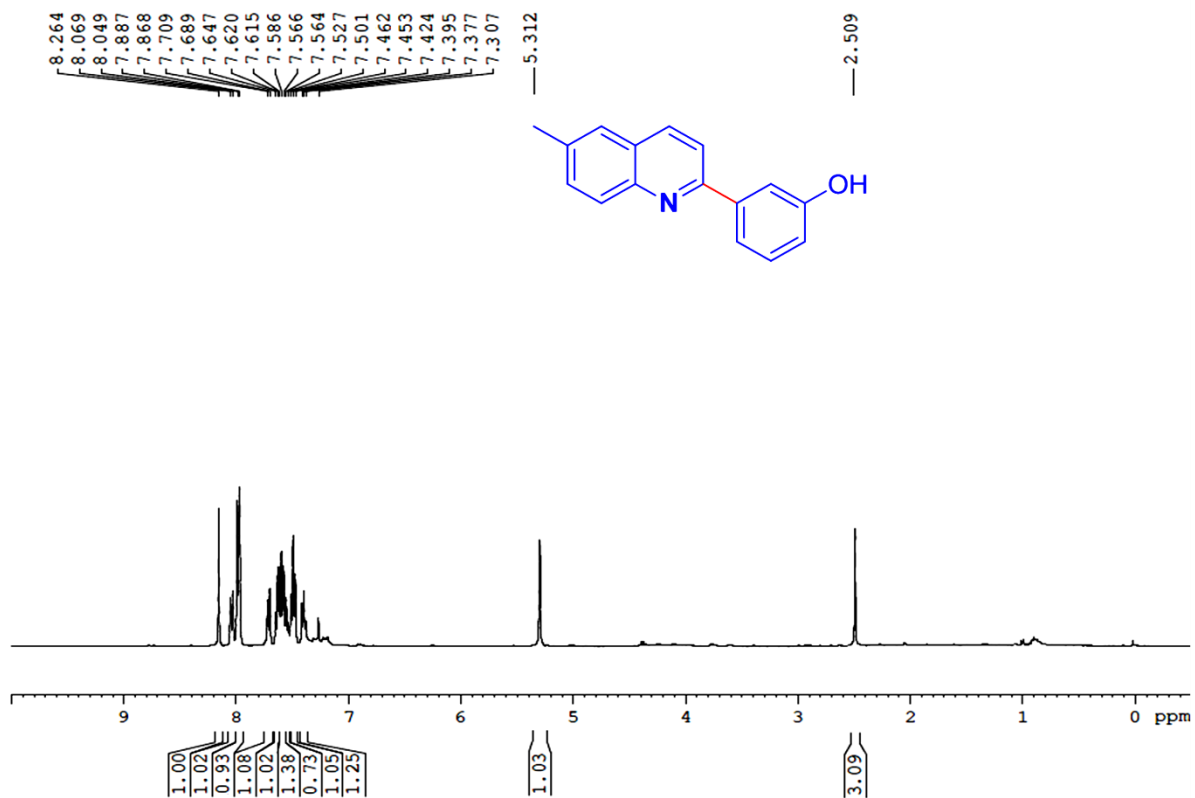

**Fig. 49.** <sup>1</sup>H NMR spectrum of 3-(6-methyl-quinolin-2-yl)-phenol (2g)

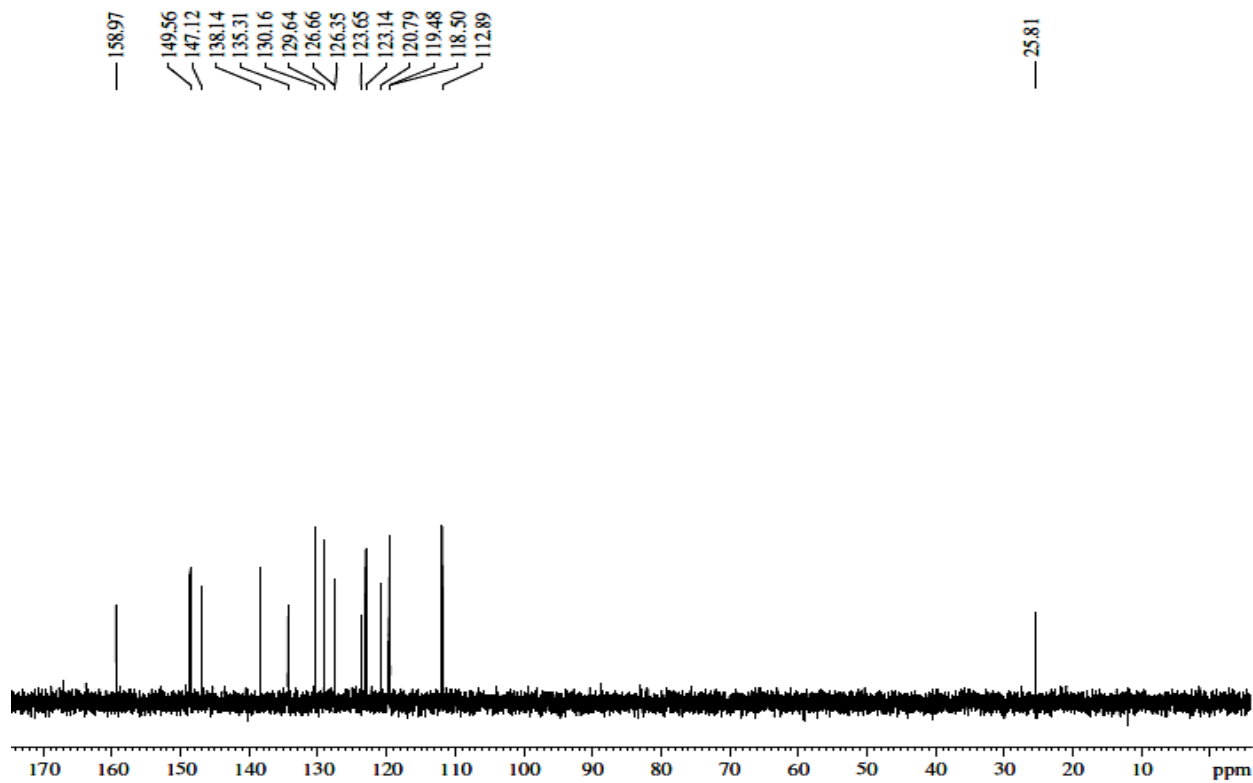

**Fig. 50.** <sup>13</sup>C NMR spectrum of 3-(6-methyl-quinolin-2-yl)-phenol (2g)

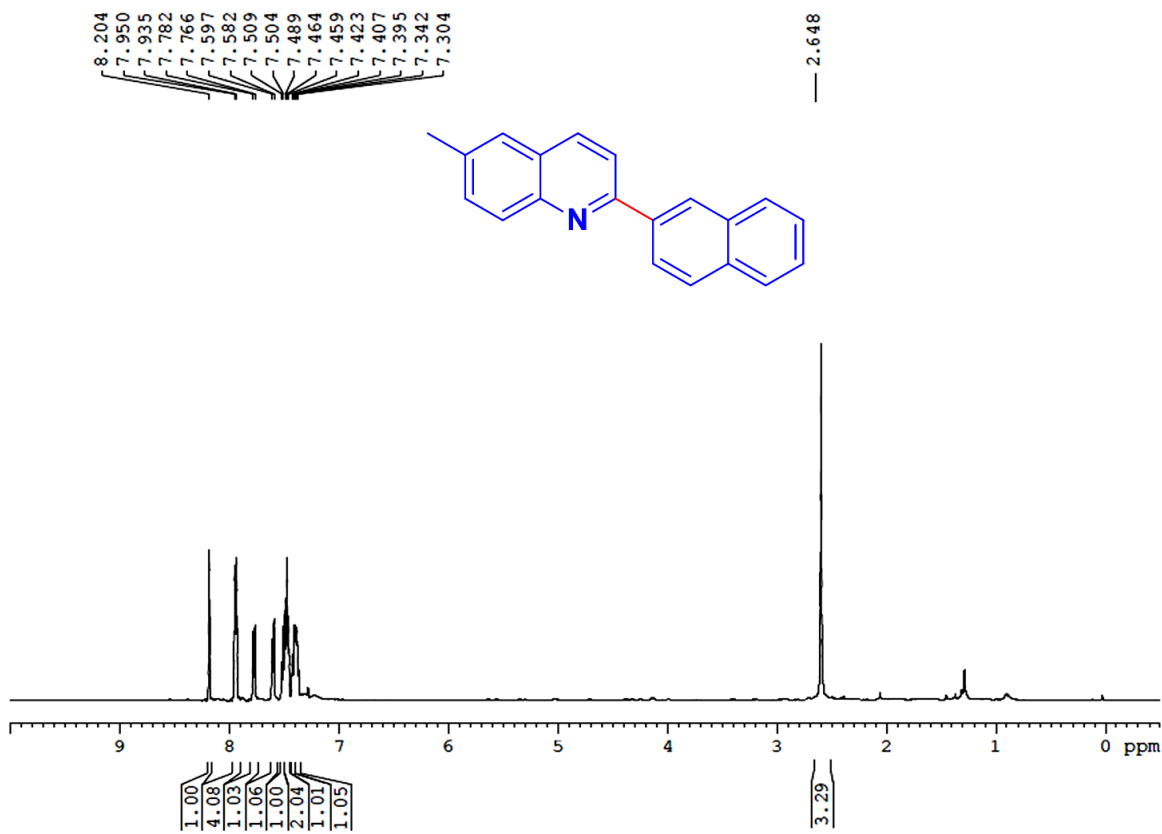

**Fig. 51.** <sup>1</sup>H NMR spectrum of 6-methyl-2-naphthalen-2-yl-quinoline (2h)

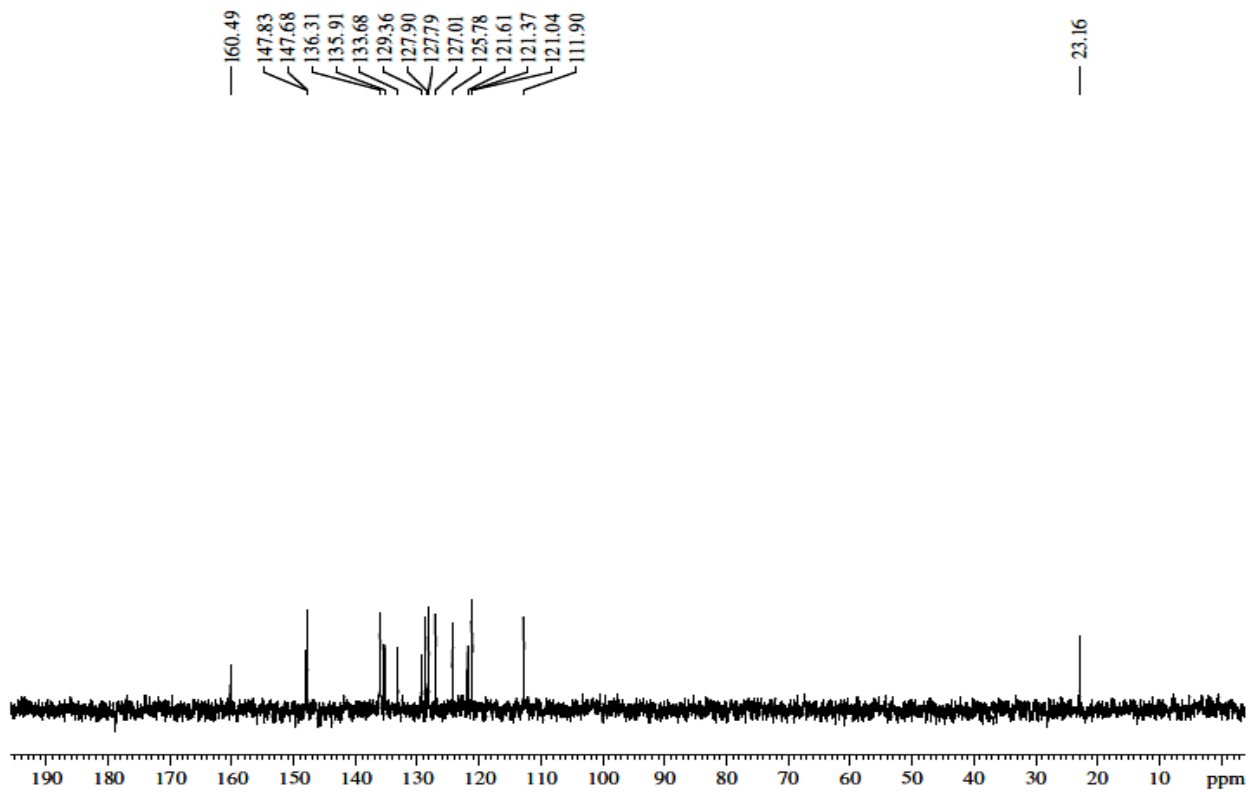

**Fig. 52.** <sup>13</sup>C NMR spectrum of 6-methyl-2-naphthalen-2-yl-quinoline (2h)

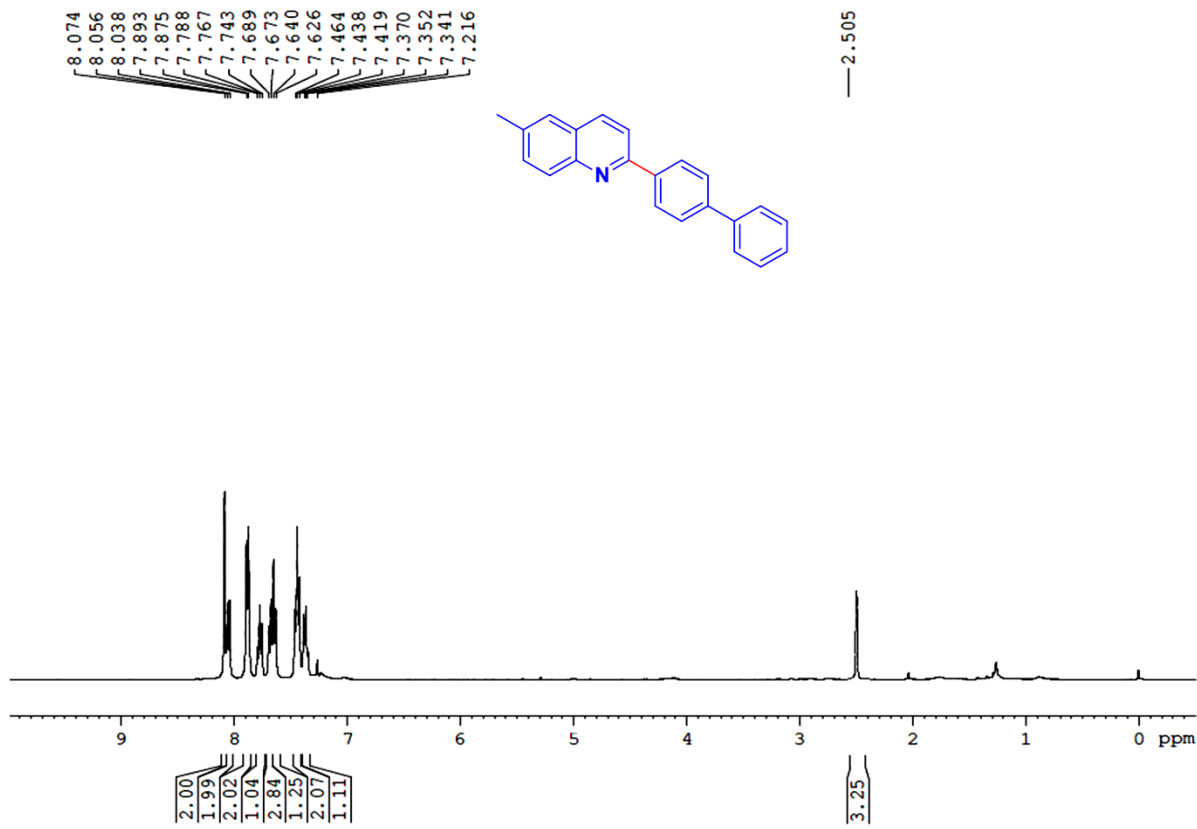

**Fig. 53.** <sup>1</sup>H NMR spectrum of 2-biphenyl-4-yl-6-methyl-quinoline (2i)

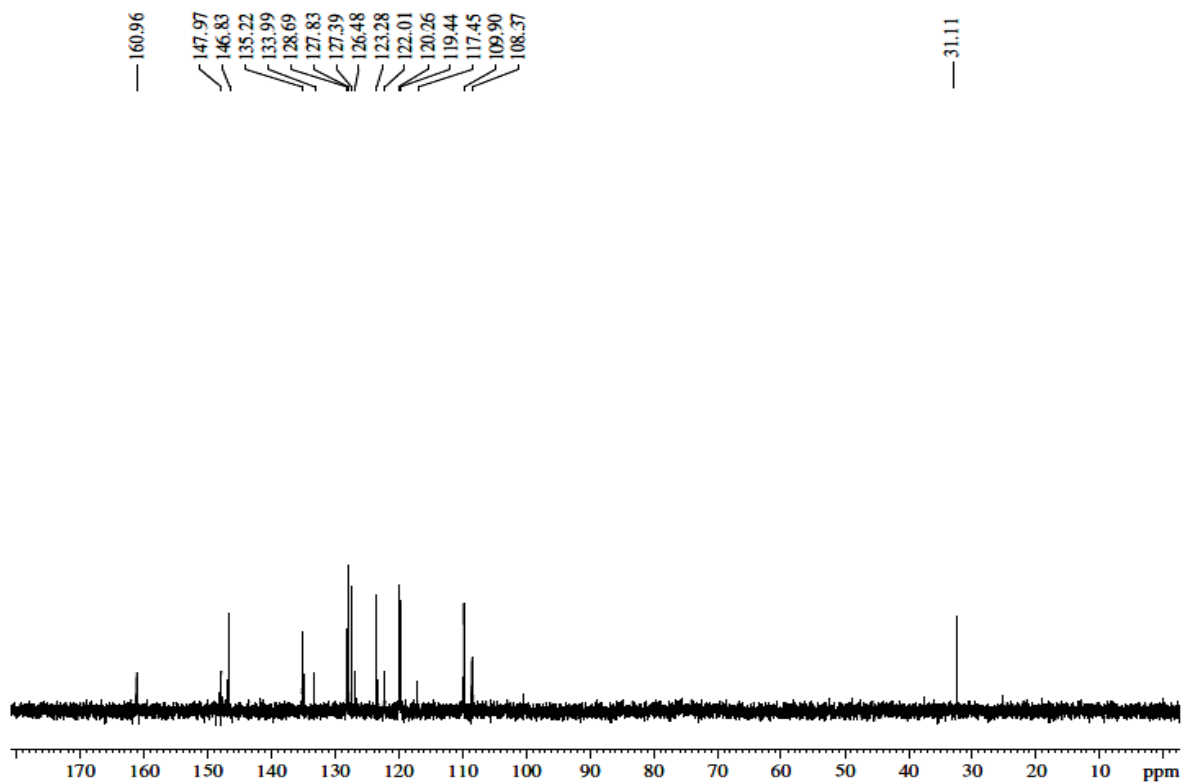

**Fig. 54.** <sup>13</sup>C NMR spectrum of 2-biphenyl-4-yl-6-methyl-quinoline (2i)

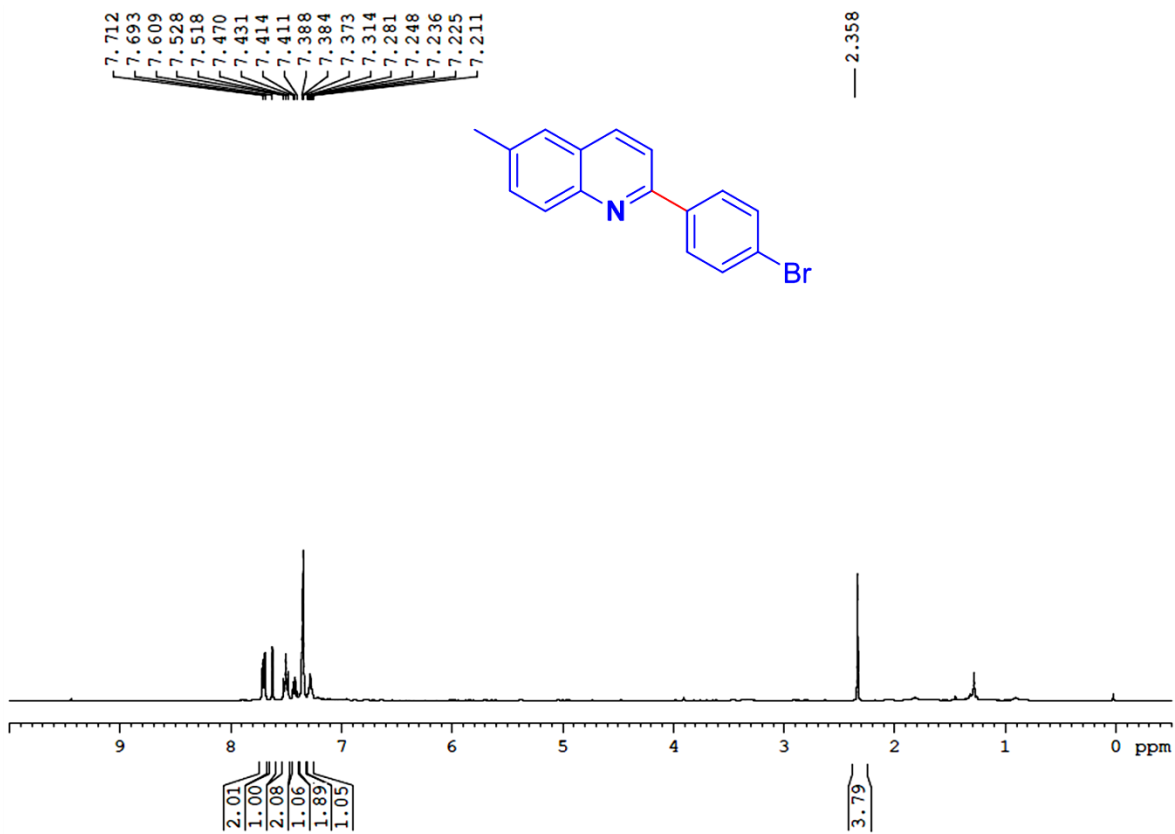

**Fig. 55.** <sup>1</sup>H NMR spectrum of 2-(4-bromo-phenyl)-6-methyl-quinoline (2j)

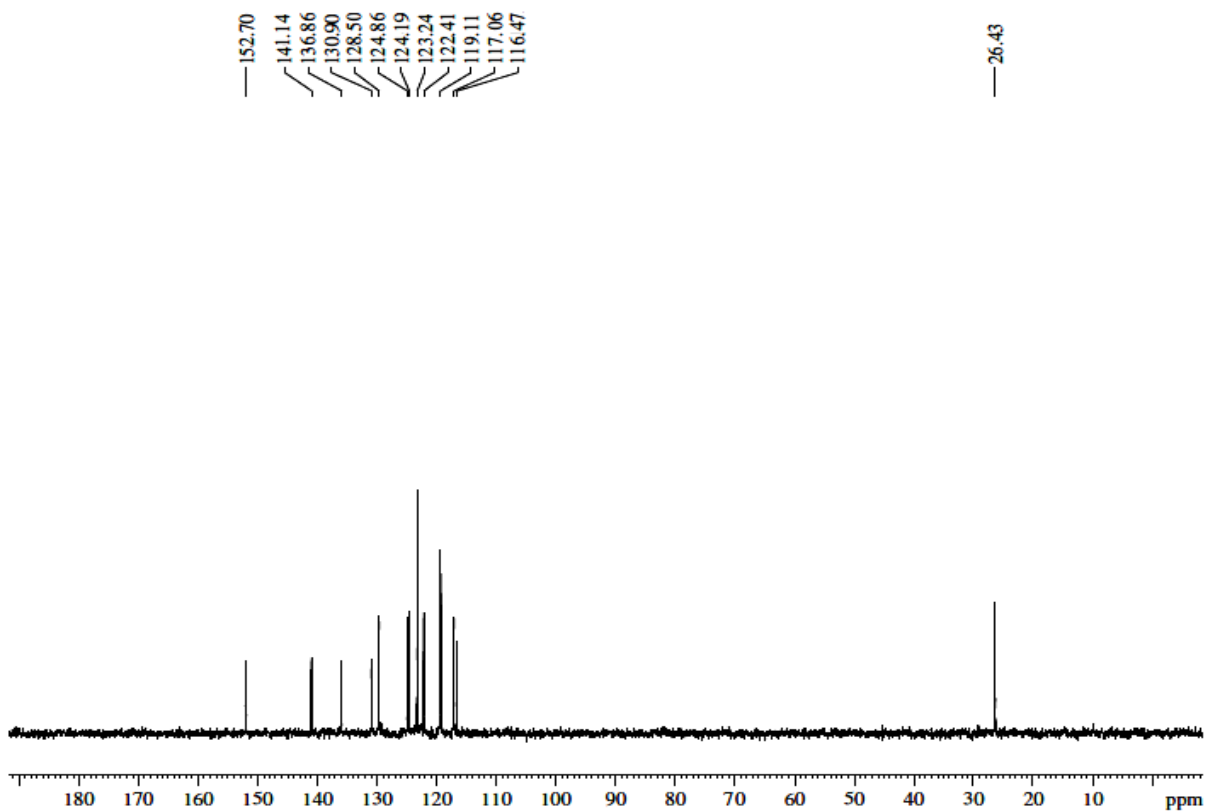

**Fig. 56.** <sup>13</sup>C NMR spectrum of 2-(4-bromo-phenyl)-6-methyl-quinoline (2j)

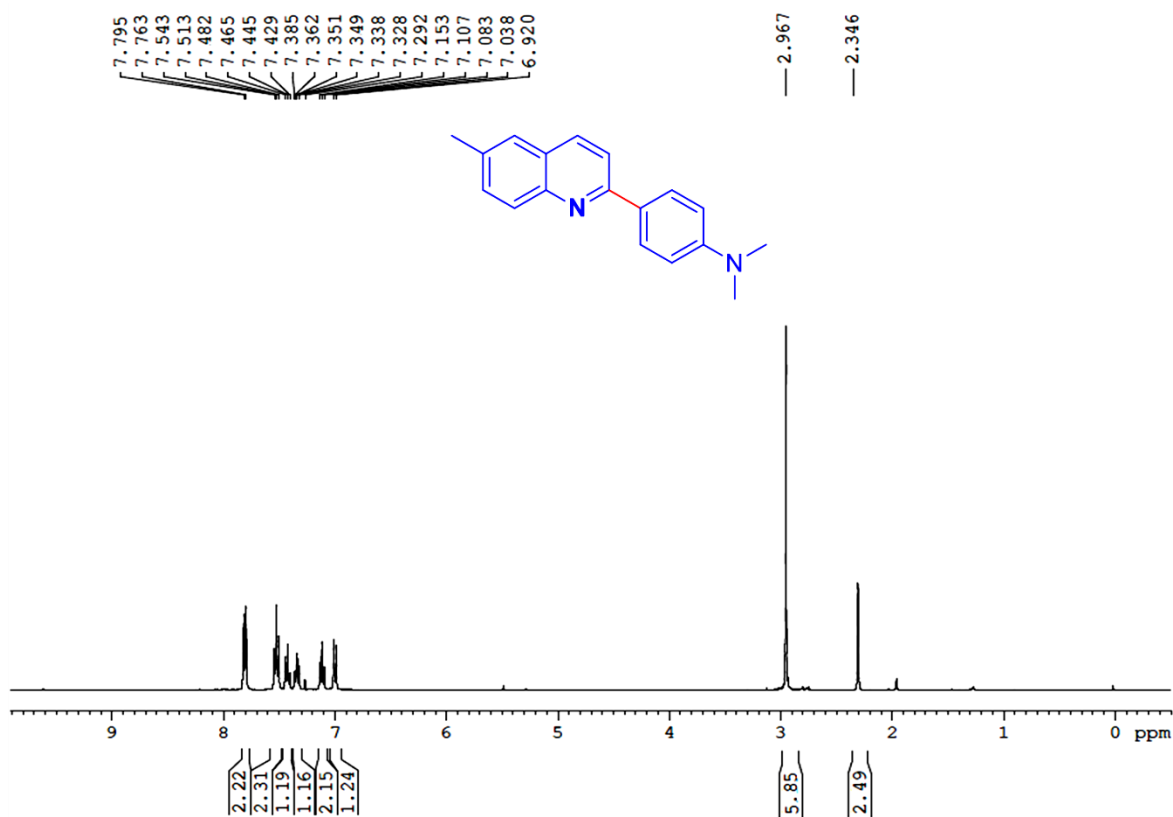

**Fig. 57.** <sup>1</sup>H NMR spectrum of dimethyl-[4-(6-methyl-quinolin-2-yl)-phenyl]-amine (2k)

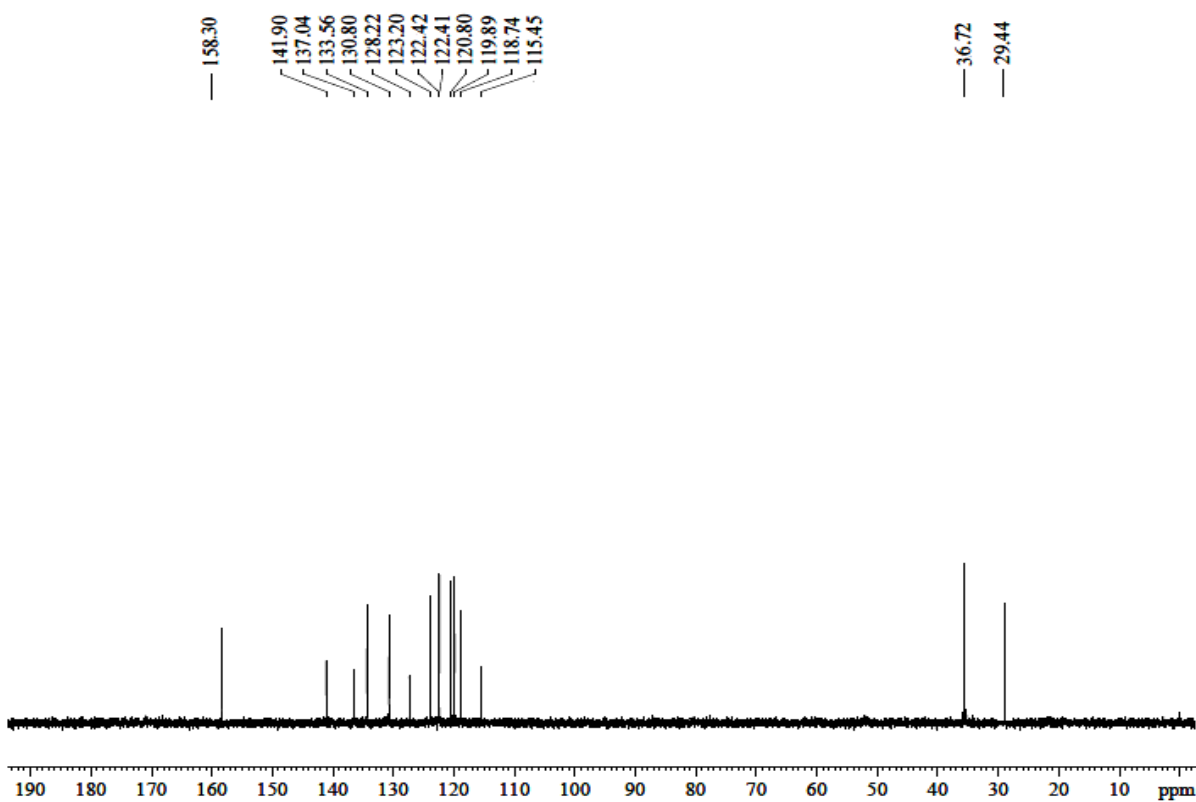

**Fig. 58.** <sup>13</sup>C NMR spectrum of dimethyl-[4-(6-methyl-quinolin-2-yl)-phenyl]-amine (2k)

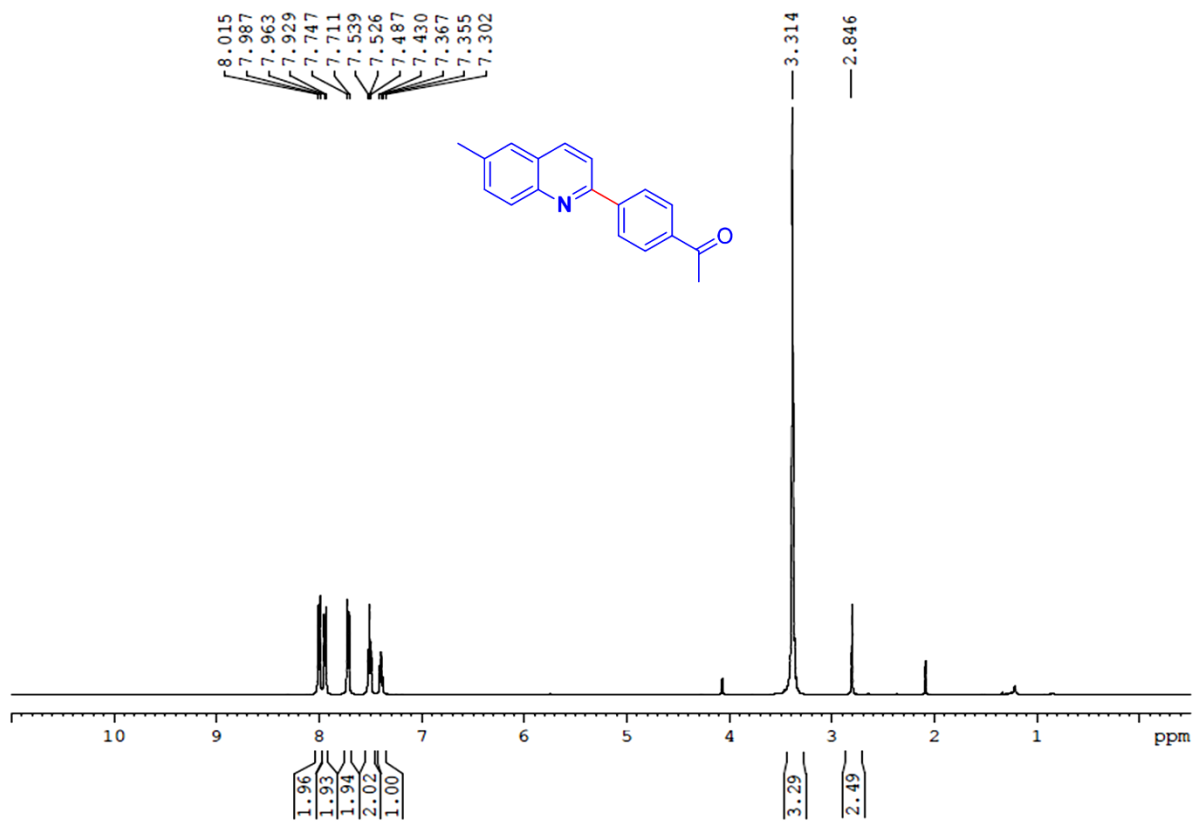

**Fig. 59.** <sup>1</sup>H NMR spectrum of dimethyl-[4-(6-methyl-quinolin-2-yl)-phenyl]-amine (21)

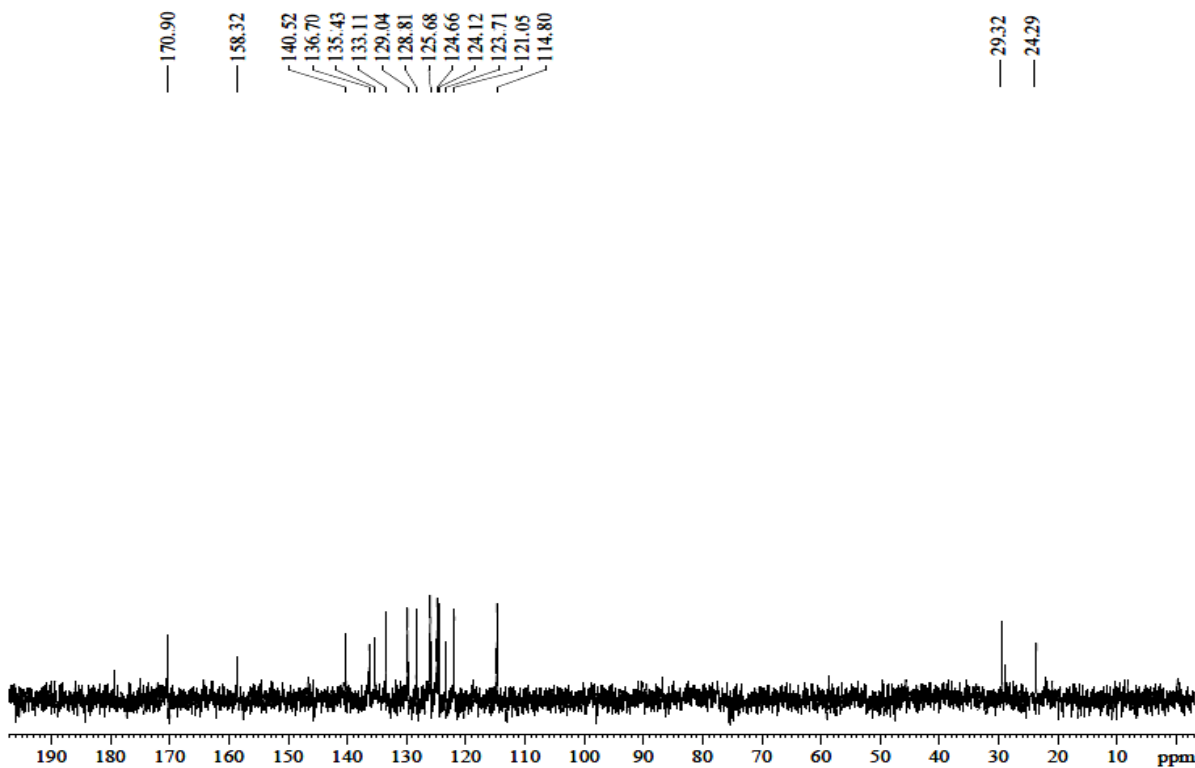

**Fig. 60.** <sup>13</sup>C NMR spectrum of dimethyl-[4-(6-methyl-quinolin-2-yl)-phenyl]-amine (21)
